# Supplementary material for: Gut microbiota differences between paired intestinal wall and digesta samples in three small species of fish
Source: PeerJ. 2022 Feb 22;10:e12992. doi: 10.7717/peerj.12992 (PMC8877339; doi:10.7717/peerj.12992)
Supplement: Data S2 — occ_mean is the mean parameter estimate for the occurence (binomial) model and abu_mean is the mean parameter estimate for the abundance (log-normal) based model. Support values indicate the level of statistical support, where >0.7 and <0.3 are cosidered as moderate statistical support, and >0.9 and <0.1 are considered as high statistical support for positive and negative association, respectively. [file peerj-10-12992-s011.xlsx]

## Sheet: Family level
Data S2. Parameter estimates from intestinal wall samples at family and ASV level from the HMSC model relative to digesta samples.
occ_mean is the mean parameter estimate for the occurence (binomial) model and abu_mean is the mean parameter estimate for the abundance (log-normal) based model. Support values indicate the level of statistical support, where >0.7 and <0.3 are cosidered as moderate statistical support, and >0.9 and <0.1 are considered as high statistical support for positive and negative association, respectivel…
Family_ID	Fish_species	occ_mean	occ_support	abu_cop_mean	abu_cop_support
Brevinemataceae	AI	-0.043197016	0.445	0.643850543	0.996
Saccharimonadaceae	AI	-0.463871703	0.103	0.430312387	0.94
Desulfovibrionaceae	AI	-0.171843482	0.288	0.433198488	0.924
A4b	AI	-0.4257357	0.135	0.334638288	0.909
Microbacteriaceae	AI	-0.180980537	0.287	0.276866863	0.813
Chlorobiaceae	AI	-0.650144417	0.034	0.166296653	0.688
Synechococcales Incertae Sedis	AI	-0.511965833	0.057	0.114199753	0.61
Rickettsiaceae	AI	-0.08166327	0.388	0.016239263	0.523
Bacteroidaceae	AI	-0.046412155	0.426	0.034305775	0.521
Diplorickettsiaceae	AI	-0.4273864	0.123	0.00207605	0.52
Desulfatiglandaceae	AI	-0.501153237	0.083	0.011757467	0.511
Desulfocapsaceae	AI	-0.846649243	0.002	-0.007907131	0.491
Vibrionaceae	AI	-0.582405031	0.062	-0.026915246	0.425
Moraxellaceae	AI	0.067633583	0.57	-0.084359943	0.413
Rhizobiales Incertae Sedis	AI	-1.11837757	0	-0.084010269	0.394
Spirochaetaceae	AI	0.043617555	0.554	-0.112089064	0.39
Desulfomonilaceae	AI	-0.513875018	0.069	-0.091404749	0.387
Stappiaceae	AI	-0.763971804	0.001	-0.175004337	0.352
Aeromonadaceae	AI	-0.514610667	0.102	-0.051033708	0.339
Alcaligenaceae	AI	-0.353890738	0.135	-0.128300513	0.333
Leptolyngbyaceae	AI	-0.71874697	0.01	-0.158553914	0.312
Fusobacteriaceae	AI	-0.524781276	0.047	-0.100457541	0.305
Rhodocyclaceae	AI	-0.197111306	0.247	-0.158133521	0.302
Lachnospiraceae	AI	-0.360896066	0.129	-0.194262172	0.297
Desulfobaccaceae	AI	-0.447101851	0.107	-0.21964425	0.267
Rikenellaceae	AI	-0.242318836	0.245	-0.287562829	0.264
Caedibacteraceae	AI	0.043664591	0.519	-0.274487879	0.244
Chitinibacteraceae	AI	-0.446995994	0.063	-0.258901012	0.243
Paracaedibacteraceae	AI	0.076128107	0.555	-0.280577121	0.237
LKC2.127-25	AI	-0.087842531	0.384	-0.343715867	0.212
Weeksellaceae	AI	-0.533577491	0.074	-0.400957311	0.202
Sulfurimonadaceae	AI	-0.048039557	0.429	-0.373523671	0.197
ST-12K33	AI	-0.577408028	0.058	-0.316014574	0.195
Competibacteraceae	AI	-0.355852024	0.131	-0.22487964	0.177
Desertifilaceae	AI	-0.262597785	0.176	-0.277194533	0.176
Staphylococcaceae	AI	-0.556699538	0.068	-0.425411353	0.17
Limnotrichaceae	AI	-0.321533086	0.191	-0.225318077	0.16
Phormidiaceae	AI	-0.372893527	0.1	-0.310894526	0.156
Caldilineaceae	AI	-0.946282275	0	-0.276648775	0.155
Clostridiaceae	AI	-0.436801715	0.078	-0.317376495	0.155
Exiguobacteraceae	AI	-0.442074837	0.086	-0.337318042	0.15
Mycobacteriaceae	AI	-0.596520268	0.049	-0.4615047	0.15
Syntrophobacteraceae	AI	-0.33033207	0.189	-0.30093086	0.142
Desulfococcaceae	AI	-0.395762346	0.108	-0.342855265	0.14
Nodosilineaceae	AI	-0.715330676	0.013	-0.268075045	0.139
Bacillaceae	AI	-0.592964076	0.013	-0.307263191	0.132
Synergistaceae	AI	-0.574754197	0.057	-0.478008162	0.131
Xiphinematobacteraceae	AI	-0.440826638	0.087	-0.463788283	0.131
Peptostreptococcaceae	AI	-0.479603096	0.055	-0.32270784	0.12
Bacteroidetes BD2-2	AI	-0.43131547	0.108	-0.549964526	0.12
Sporichthyaceae	AI	-0.513327091	0.065	-0.499593818	0.118
Vermiphilaceae	AI	-0.365652285	0.126	-0.435916766	0.114
Lentimicrobiaceae	AI	-0.493053757	0.051	-0.310956156	0.113
Nostocaceae	AI	-0.601850815	0.045	-0.590039595	0.113
Planococcaceae	AI	-0.743191566	0.013	-0.357109309	0.109
Isosphaeraceae	AI	-0.420936095	0.114	-0.543920563	0.104
T34	AI	-0.263093043	0.219	-0.534098747	0.102
Methanobacteriaceae	AI	-0.4172458	0.111	-0.446360048	0.1
Arenicellaceae	AI	-0.485920326	0.059	-0.449737467	0.099
Flavobacteriaceae	AI	-0.44304609	0.093	-0.468412445	0.098
Streptococcaceae	AI	-0.257393628	0.225	-0.522578389	0.075
Xanthobacteraceae	AI	-0.748268366	0.014	-0.627218992	0.072
Nitrosomonadaceae	AI	-0.604988531	0.025	-0.429372718	0.071
Enterobacteriaceae	AI	-0.204126698	0.233	-0.360328064	0.065
Erysipelotrichaceae	AI	-0.305873944	0.166	-0.65595876	0.065
Gloeocapsaceae	AI	-0.603601256	0.032	-0.241482932	0.064
Shewanellaceae	AI	-0.398055493	0.1	-0.309495194	0.062
Cyanobacteriaceae	AI	-0.358852111	0.135	-0.460727768	0.055
Paraspirulinaceae	AI	-0.43653753	0.1	-0.397349844	0.053
Verrucomicrobiaceae	AI	-0.556323954	0.035	-0.600873347	0.052
Prolixibacteraceae	AI	-0.31072206	0.165	-0.51515467	0.051
Myxococcaceae	AI	-0.44027227	0.107	-0.538045513	0.046
Legionellaceae	AI	-0.549921568	0.047	-0.684906326	0.043
Comamonadaceae	AI	-0.727782269	0.003	-0.529485154	0.04
Methanoregulaceae	AI	-0.447930875	0.114	-0.595481946	0.04
Chloroflexaceae	AI	-0.326058059	0.185	-0.406988005	0.038
Phycisphaeraceae	AI	-0.244711086	0.244	-0.664806144	0.035
Nocardioidaceae	AI	-0.447423481	0.106	-0.724908649	0.035
SC-I-84	AI	-0.172955071	0.323	-0.643523431	0.03
Rhodospirillaceae	AI	-0.173123734	0.325	-0.76391336	0.03
B1-7BS	AI	-0.911200103	0.001	-0.454396549	0.029
Pseudomonadaceae	AI	-0.408008641	0.097	-0.542334192	0.027
Ruminococcaceae	AI	-0.406210001	0.126	-0.8072059	0.025
Mycoplasmataceae	AI	-0.420875757	0.069	-0.395583499	0.022
Sumerlaeaceae	AI	-0.619013992	0.042	-0.792679693	0.019
Obscuribacteraceae	AI	-0.368378628	0.093	-0.542611304	0.019
NS11-12 marine group	AI	-0.16374523	0.306	-0.756552859	0.019
Anaerolineaceae	AI	-0.429990002	0.121	-0.369826039	0.017
Desulfosarcinaceae	AI	-0.355899937	0.168	-0.626382778	0.016
Rhizobiaceae	AI	-0.668538667	0.013	-0.466413166	0.016
Sutterellaceae	AI	-0.459353637	0.081	-0.461994699	0.015
Steroidobacteraceae	AI	-0.6407575	0.018	-0.398127207	0.013
Geminicoccaceae	AI	-0.739734693	0.007	-0.453883218	0.013
Chromatiaceae	AI	-0.605348876	0.022	-0.311010965	0.012
Micrococcaceae	AI	-0.566478332	0.052	-0.879986909	0.011
Defluviicoccaceae	AI	-0.541807334	0.066	-0.517670959	0.01
Elioraeaceae	AI	-0.533753237	0.071	-0.953422808	0.01
Methylococcaceae	AI	-0.475077024	0.075	-0.601542325	0.009
Microcystaceae	AI	-0.589623064	0.038	-0.415324321	0.008
Gemmatimonadaceae	AI	-0.773994661	0.014	-0.838242072	0.007
Phormidesmiaceae	AI	-0.366029276	0.144	-0.814056995	0.007
Caulobacteraceae	AI	-0.39199342	0.117	-1.257476238	0.006
Sphingomonadaceae	AI	-0.393537591	0.098	-0.545066999	0.006
Tannerellaceae	AI	-0.304536219	0.193	-1.122280642	0.006
Beijerinckiaceae	AI	-0.7184008	0.009	-0.996693314	0.005
Holosporaceae	AI	-0.377613178	0.136	-1.270478516	0.005
Methanosaetaceae	AI	-0.309366567	0.195	-0.704251149	0.004
Chthoniobacteraceae	AI	-0.469615287	0.073	-0.843391894	0.004
Pirellulaceae	AI	-0.612753326	0.027	-0.722880454	0.002
Hyphomicrobiaceae	AI	-0.586508876	0.022	-0.807278652	0.002
Cryomorphaceae	AI	-0.549348615	0.04	-0.807939698	0.002
Rhodobacteraceae	AI	-0.808143473	0.01	-0.611605222	0.001
Rubritaleaceae	AI	-0.406247716	0.101	-0.678411571	0
Chitinophagaceae	AI	-0.658860926	0.017	-0.613247083	0
Cyanobiaceae	AI	-0.364691152	0.124	-0.56835886	0
Terrimicrobiaceae	AI	-0.181038872	0.278	-0.737261818	0
Cyclobacteriaceae	AI	-0.86415126	0	-0.74761944	0
Acetobacteraceae	AI	-0.966854392	0	-0.631775155	0
Ilumatobacteraceae	AI	-0.438688691	0.092	-1.024978321	0
Methylococcaceae	GH	-0.506524927	0.069	0.413782774	0.876
Mycoplasmataceae	GH	-0.15815765	0.277	0.19354573	0.728
Desulfovibrionaceae	GH	-0.120059563	0.355	0.145059766	0.688
Streptococcaceae	GH	-0.127876984	0.364	0.166327346	0.68
Vicinamibacteraceae	GH	-0.21531901	0.244	-0.006024998	0.478
Pirellulaceae	GH	-0.235151463	0.259	-0.136365132	0.368
Family XI	GH	-0.153203957	0.305	-0.136704624	0.359
Brevinemataceae	GH	-0.286259002	0.234	-0.121143594	0.359
Lachnospiraceae	GH	-0.214575164	0.233	-0.086031677	0.357
Corynebacteriaceae	GH	0.066342816	0.572	-0.197197218	0.288
Selenomonadaceae	GH	-0.128162303	0.345	-0.231466723	0.281
Lactobacillaceae	GH	-0.43273068	0.12	-0.210171829	0.28
Dongiaceae	GH	-0.496637567	0.048	-0.149085164	0.265
Pleomorphomonadaceae	GH	-0.296858495	0.206	-0.210509471	0.265
Geothermobacteraceae	GH	-0.73831413	0.012	-0.232257503	0.263
Desulfomicrobiaceae	GH	-0.25605391	0.218	-0.195508412	0.252
Dysgonomonadaceae	GH	-0.162108004	0.328	-0.259936809	0.238
Erysipelotrichaceae	GH	-0.460617454	0.063	-0.213415507	0.229
Vibrionaceae	GH	-0.587748883	0.03	-0.156308213	0.211
Chthoniobacteraceae	GH	-0.695659364	0.024	-0.299407725	0.201
Saccharospirillaceae	GH	-0.222358194	0.265	-0.28808596	0.193
Burkholderiales Incertae Sedis	GH	0.005215107	0.491	-0.322282257	0.192
Desulfobaccaceae	GH	-0.876688851	0.003	-0.277445919	0.182
Pelotomaculaceae	GH	-0.73279939	0.01	-0.296656814	0.179
Enterobacteriaceae	GH	-0.921179794	0.001	-0.193297677	0.176
Opitutaceae	GH	-0.254837051	0.24	-0.291386214	0.171
Moraxellaceae	GH	-0.789860634	0.007	-0.311210928	0.15
Geminicoccaceae	GH	-0.1292523	0.33	-0.327584113	0.148
Exiguobacteraceae	GH	-0.70554759	0.011	-0.259194237	0.143
Desulfobulbaceae	GH	-0.614918163	0.02	-0.259294586	0.141
Phormidiaceae	GH	-0.88768579	0	-0.334234204	0.141
Chitinimonadaceae	GH	-0.874528883	0.002	-0.308250919	0.138
Staphylococcaceae	GH	0.017066661	0.509	-0.369307943	0.135
Methyloligellaceae	GH	-0.140348132	0.341	-0.378131291	0.133
Arcobacteraceae	GH	-0.648907444	0.015	-0.229107294	0.13
Xanthomonadaceae	GH	-0.329066372	0.162	-0.36116433	0.125
Desulfosarcinaceae	GH	-0.898515188	0.002	-0.212017706	0.122
Tannerellaceae	GH	-0.575767424	0.046	-0.429211337	0.12
Fusobacteriaceae	GH	-0.368903256	0.158	-0.206041626	0.112
Chitinibacteraceae	GH	-0.334259064	0.126	-0.330220148	0.106
Peptostreptococcaceae	GH	-0.562654126	0.049	-0.256394501	0.103
Sulfurovaceae	GH	-0.416395177	0.086	-0.434374992	0.095
Flammeovirgaceae	GH	-0.526043529	0.028	-0.352857429	0.095
Leptolyngbyaceae	GH	-0.575535973	0.06	-0.473828703	0.094
Desulfocapsaceae	GH	-0.564167886	0.041	-0.292247212	0.092
Ruminococcaceae	GH	-0.724153569	0.028	-0.490826578	0.087
Microbacteriaceae	GH	-0.591073584	0.061	-0.471905999	0.086
SC-I-84	GH	-1.053800965	0	-0.39944792	0.084
Shewanellaceae	GH	-0.116541644	0.335	-0.369830472	0.084
Sulfurimonadaceae	GH	-0.181961229	0.315	-0.388998901	0.078
Nodosilineaceae	GH	-0.435964678	0.098	-0.516303065	0.076
Unknown Family	GH	-0.893377355	0.001	-0.394216999	0.074
Thermoanaerobaculaceae	GH	-0.439867941	0.082	-0.349225587	0.074
Sporichthyaceae	GH	-0.651934884	0.032	-0.598267327	0.064
Diplorickettsiaceae	GH	-0.578172881	0.061	-0.549118559	0.064
Limnotrichaceae	GH	-0.411195812	0.136	-0.616939281	0.064
Rickettsiaceae	GH	-0.375474874	0.108	-0.453003805	0.063
Burkholderiaceae	GH	-0.715784711	0.017	-0.37121795	0.06
Rubritaleaceae	GH	-1.052074597	0.001	-0.352521269	0.054
Micrococcaceae	GH	0.116907165	0.639	-0.548175891	0.053
Aeromonadaceae	GH	-0.717636329	0.061	-0.264440842	0.048
Clostridiaceae	GH	-0.729354366	0.013	-0.332198294	0.047
Bacteroidetes vadinHA17	GH	-0.756333965	0.017	-0.408572518	0.047
Rhizobiaceae	GH	-0.537172783	0.028	-0.48006651	0.045
Microcystaceae	GH	-0.81558636	0.004	-0.491831622	0.045
Acetobacteraceae	GH	-0.698416785	0.008	-0.452643934	0.041
Alteromonadaceae	GH	-0.386304057	0.12	-0.41696343	0.04
Anaerolineaceae	GH	-0.355725138	0.133	-0.343522818	0.04
Acidiferrobacteraceae	GH	-0.526747159	0.035	-0.461085614	0.035
Nitrosomonadaceae	GH	-1.037275743	0	-0.387134842	0.034
BSV26	GH	-0.817234873	0.008	-0.42655745	0.033
Spongiibacteraceae	GH	-0.749673657	0.007	-0.505837612	0.032
Rhodanobacteraceae	GH	-0.373533508	0.139	-0.591581029	0.027
LWQ8	GH	-0.536946091	0.07	-0.604180323	0.027
Paludibacteraceae	GH	-0.314885084	0.154	-0.571798105	0.022
Oscillatoriaceae	GH	-0.093778401	0.389	-0.5018252	0.019
Sphingomonadaceae	GH	-0.477081885	0.069	-0.654206846	0.019
Rhizobiales Incertae Sedis	GH	-1.102270174	0.001	-0.41732087	0.018
Cyanobacteriaceae	GH	-0.594753257	0.03	-0.594645801	0.016
Halieaceae	GH	-1.125802504	0	-0.483599006	0.016
Bacillaceae	GH	-0.075361335	0.389	-0.598485299	0.015
Sporomusaceae	GH	-0.258054792	0.235	-0.653416412	0.014
Desulfococcaceae	GH	-0.555639313	0.043	-0.581026921	0.011
Pedosphaeraceae	GH	-0.776331733	0.009	-0.540038991	0.01
Mycobacteriaceae	GH	-0.69113385	0.024	-0.989734951	0.01
Desertifilaceae	GH	-0.347066466	0.146	-0.876530898	0.009
Saccharimonadaceae	GH	-0.284550656	0.222	-0.813869897	0.008
Bacteroidaceae	GH	-0.180704598	0.304	-0.788513216	0.008
Saprospiraceae	GH	-0.633955188	0.025	-0.616300751	0.008
Caldilineaceae	GH	-0.774057402	0.004	-0.619155173	0.007
Verrucomicrobiaceae	GH	-0.711616324	0.013	-0.828511899	0.007
Nitrososphaeraceae	GH	-0.570393382	0.037	-0.703907906	0.006
Syntrophobacteraceae	GH	-0.726612432	0.018	-0.636736074	0.006
Woeseiaceae	GH	-0.049255247	0.425	-0.809017296	0.005
Nitrosococcaceae	GH	-0.457528441	0.091	-0.540921476	0.005
Methanoregulaceae	GH	-1.0732094	0	-0.49484171	0.005
Arenicellaceae	GH	-0.848118615	0.005	-0.54252033	0.004
Rhodocyclaceae	GH	-0.649921189	0.04	-0.442283619	0.004
LKC2.127-25	GH	-0.278363508	0.225	-0.807081096	0.004
Rhodobacteraceae	GH	-1.03811032	0.001	-0.59067986	0.003
Sutterellaceae	GH	-0.795930397	0.012	-0.498485616	0.003
DEV007	GH	-0.595249446	0.052	-1.170673861	0.002
Terrimicrobiaceae	GH	-0.448425666	0.115	-0.673909333	0.002
Cyclobacteriaceae	GH	-0.584058691	0.029	-0.561748208	0.001
Hyphomicrobiaceae	GH	-0.706169702	0.008	-0.692063939	0.001
Flavobacteriaceae	GH	-0.848207734	0.001	-0.84170621	0.001
Prolixibacteraceae	GH	-0.458270215	0.072	-0.667041052	0.001
Desulfatiglandaceae	GH	-0.559551217	0.071	-0.770399056	0.001
Cyanobiaceae	GH	-0.515409858	0.03	-0.712941273	0.001
Hydrogenophilaceae	GH	-0.630050218	0.033	-0.623590467	0.001
Ignavibacteriaceae	GH	-0.714022578	0.025	-0.698099844	0.001
Competibacteraceae	GH	-0.731587137	0.023	-0.86547985	0.001
TC1	GH	-0.272024864	0.229	-0.885631153	0.001
Steroidobacteraceae	GH	-0.932735124	0.003	-0.549029578	0
Lentimicrobiaceae	GH	-0.474630858	0.081	-0.719403111	0
Pseudomonadaceae	GH	-0.405672539	0.136	-0.522473368	0
Comamonadaceae	GH	-0.622681345	0.044	-0.652845082	0
Microtrichaceae	GH	-0.629726185	0.048	-0.993691568	0
Beijerinckiaceae	GH	-0.903072548	0.003	-0.847846189	0
Chitinophagaceae	GH	-0.366975762	0.126	-0.529317609	0
Chromatiaceae	GH	-0.704889808	0.012	-0.510852764	0
PHOS-HE36	GH	-0.789869169	0.01	-0.672317892	0
B1-7BS	GH	-0.776213461	0.004	-0.657122129	0
Microscillaceae	GH	-0.656265385	0.03	-0.735370022	0
Ilumatobacteraceae	GH	-0.515832157	0.061	-0.682396128	0
Mycoplasmataceae	VH	-0.443268912	0.16	0.611353458	0.998
Desulfovibrionaceae	VH	-0.460613806	0.099	1.347119082	0.946
SB-5	VH	-0.858475729	0.01	-0.448167816	0.266
type III	VH	-0.583568039	0.062	-0.528245467	0.229
Rhizobiales Incertae Sedis	VH	-1.075725285	0.001	-0.592475799	0.211
Leptolyngbyaceae	VH	-0.91921578	0.005	-0.563515033	0.203
Enterobacteriaceae	VH	-0.808552008	0.003	-0.39510742	0.171
Lactobacillaceae	VH	-0.556044559	0.042	-0.473122889	0.151
Lachnospiraceae	VH	-0.779213255	0.011	-0.433996724	0.144
Erysipelotrichaceae	VH	-0.931578069	0.003	-0.509255771	0.14
Vibrionaceae	VH	-1.084808311	0.002	-0.333548215	0.123
Rhizobiaceae	VH	-0.814033083	0.017	-0.966869148	0.099
Sutterellaceae	VH	-0.814907619	0.02	-1.025813623	0.089
Acetobacteraceae	VH	-0.719261148	0.021	-0.849929401	0.072
Comamonadaceae	VH	-0.302637741	0.189	-0.671354089	0.067
Barnesiellaceae	VH	-0.676322464	0.03	-1.004373841	0.051
Kineosporiaceae	VH	-0.782031112	0.009	-1.364640512	0.037
Brevinemataceae	VH	-0.437642031	0.088	-0.830815922	0.035
Shewanellaceae	VH	-1.124431643	0	-0.818037322	0.032
Chromobacteriaceae	VH	-0.683748098	0.047	-1.45679284	0.028
Clostridiaceae	VH	-0.873995478	0	-0.663202227	0.023
B1-7BS	VH	-0.727234883	0.024	-1.318962074	0.014
Chitinibacteraceae	VH	-0.525774372	0.099	-1.119242128	0.012
Pseudomonadaceae	VH	-0.58072172	0.071	-1.460886749	0.011
Orbaceae	VH	-0.531766719	0.084	-0.954035071	0.011
Weeksellaceae	VH	-0.526517673	0.107	-0.952679398	0.01
Streptococcaceae	VH	-0.687382754	0.013	-1.25896265	0.008
Bacillaceae	VH	-0.920057046	0.003	-1.192990129	0.004
Fusobacteriaceae	VH	-0.542578969	0.099	-0.583649638	0.003
Alteromonadaceae	VH	-0.420803415	0.118	-1.498690408	0.003
SC-I-84	VH	-0.447585712	0.11	-0.988198023	0.002
Nodosilineaceae	VH	-0.769259804	0.02	-1.740388003	0.002
Nitrospiraceae	VH	-0.520599035	0.114	-1.391921486	0.001
Chthoniobacteraceae	VH	-0.894511278	0.009	-1.851154618	0.001
Peptostreptococcaceae	VH	-0.832863087	0.005	-0.80496641	0.001
Cyanobiaceae	VH	-0.782735163	0.016	-1.889601923	0
Aeromonadaceae	VH	-575027 days, 5:14:00	00:17:00	-599264 days, 0:44:00	0

## Sheet: ASV level
Data S2. Parameter estimates from intestinal wall samples at family and ASV level from the HMSC model relative to digesta samples.
occ_mean is the mean parameter estimate for the occurence (binomial) model and abu_mean is the mean parameter estimate for the abundance (lognormal) based model. Support values indicate the level of statistical support where >0.7 and <0.3 are cosidered as moderate statistical support and >0.9 and <0.1 are considered as high statistical support.
ASV_ID	Genus	Fish_species	occ_mean	occ_support	abu_cop_mean	abu_cop_support
ASV_1581	NA	AI	-0.720747466	0.009	0.497417637	0.998
ASV_16	Brevinema	AI	0.019614533	0.517	0.764540001	0.998
ASV_161	Vibrio	AI	-0.59881086	0.043	0.410424582	0.981
ASV_1636	TM7a	AI	-0.676765569	0.021	0.551313309	0.974
ASV_37	NA	AI	-0.165951237	0.285	0.532286206	0.961
ASV_2060	Aquicella	AI	-0.644031515	0.033	0.38333535	0.922
ASV_3622	[Desulfobacterium] catecholicum group	AI	-0.47368685	0.06	0.559696683	0.918
ASV_2540	Planktothrix NIVA-CYA 15	AI	-0.700288047	0.012	0.856509856	0.915
ASV_874	Arthronema SAG 12.89	AI	-0.76987775	0.007	0.216307313	0.9
ASV_2390	Vibrio	AI	-0.522367611	0.064	0.353912728	0.881
ASV_1527	Nodosilinea PCC-7104	AI	-0.80788136	0.01	0.547463694	0.876
ASV_12	Vibrio	AI	-0.409212572	0.068	0.284467365	0.869
ASV_1981	Desulfatiglans	AI	-0.711003812	0.021	0.476322948	0.866
ASV_1004	NA	AI	-0.50066849	0.061	0.415700554	0.858
ASV_2284	Terrimicrobium	AI	-0.754293668	0.01	0.396832529	0.845
ASV_576	NA	AI	-0.482163252	0.071	0.425777714	0.836
ASV_2129	Mycoplasma	AI	-0.734504821	0.009	0.327471617	0.825
ASV_7375	NA	AI	-0.559735486	0.049	0.181913209	0.811
ASV_1380	Lamprocystis	AI	-0.585868988	0.039	0.424294012	0.798
ASV_89	NA	AI	-0.570615774	0.019	0.154447496	0.798
ASV_1193	Thauera	AI	-0.641913945	0.025	0.446461691	0.796
ASV_698	Lamprocystis	AI	-0.693452497	0.017	0.231602587	0.791
ASV_876	Chlorobaculum	AI	-0.801029175	0.007	0.319136259	0.789
ASV_536	NA	AI	-0.733125112	0.015	0.21057667	0.779
ASV_1674	Rubribacterium	AI	-0.5877867	0.022	0.277989541	0.771
ASV_3230	NA	AI	-0.581133141	0.034	0.257282863	0.768
ASV_219	C39	AI	-0.561806985	0.043	0.193186417	0.757
ASV_1017	Candidatus Contendobacter	AI	-0.641761469	0.024	0.182871911	0.751
ASV_1530	Aquicella	AI	-0.721829604	0.015	0.267962228	0.746
ASV_2061	NA	AI	-0.870551926	0.004	0.318770389	0.739
ASV_1298	NA	AI	-0.709277139	0.016	0.274474751	0.737
ASV_157	Cyanobium PCC-6307	AI	-0.650788244	0.015	0.099927221	0.721
ASV_1053	Luteolibacter	AI	-0.901030332	0.002	0.19735181	0.719
ASV_17	Cetobacterium	AI	-0.676788412	0.007	0.149891885	0.719
ASV_780	GKS98 freshwater group	AI	-0.4407769	0.067	0.195850606	0.719
ASV_411	NA	AI	-0.648025966	0.007	0.2267448	0.712
ASV_1748	Desulfomonile	AI	-0.670646377	0.021	0.127071506	0.703
ASV_1816	Synechocystis PCC-6803	AI	-0.601986298	0.037	0.398640719	0.699
ASV_666	Cyanobium PCC-6307	AI	-0.826159183	0.001	0.316594299	0.699
ASV_663	NA	AI	-0.73813792	0.01	0.113574026	0.695
ASV_2480	NA	AI	-0.471764287	0.059	0.205157528	0.692
ASV_2113	Hydrogenophaga	AI	-0.365632978	0.121	0.223230325	0.682
ASV_252	Epulopiscium	AI	-0.555176422	0.032	0.122376064	0.67
ASV_522	Lentimicrobium	AI	-0.521070764	0.045	0.177348544	0.666
ASV_3319	Schizothrix LEGE 07164	AI	-0.728667	0.01	0.245847465	0.663
ASV_3487	Microcystis PCC-7914	AI	-0.603749386	0.043	0.335266152	0.653
ASV_1863	NA	AI	-0.083997662	0.362	0.198001076	0.651
ASV_873	NA	AI	-0.661406339	0.016	0.111965043	0.65
ASV_868	Rubribacterium	AI	-0.831333291	0.008	0.159843384	0.647
ASV_2541	Rubritepida	AI	-0.604013393	0.031	0.321986525	0.638
ASV_4615	Acinetobacter	AI	-0.170257756	0.278	0.178338609	0.632
ASV_2539	Rubribacterium	AI	-0.690282975	0.011	0.124872841	0.63
ASV_2246	Bacteroides	AI	-0.233465733	0.218	0.14113699	0.626
ASV_129	Epulopiscium	AI	-0.662136266	0.02	0.086862635	0.619
ASV_1634	Allorhizobium-Neorhizobium-Pararhizobium-Rhizobium	AI	-0.575884461	0.037	0.189661273	0.619
ASV_7	Vibrio	AI	-0.363770445	0.113	0.054988994	0.617
ASV_84	Aeromonas	AI	-0.663915369	0.007	0.077444871	0.602
ASV_1929	Nodosilinea PCC-7104	AI	-0.527569597	0.055	0.138417608	0.593
ASV_624	Bacillus	AI	-0.777923381	0.008	0.121426146	0.591
ASV_4367	Roseobacter clade CHAB-I-5 lineage	AI	-0.579575425	0.044	0.11730385	0.59
ASV_773	Porphyrobacter	AI	-0.738641862	0.006	0.072720829	0.589
ASV_484	Candidatus Megaira	AI	-0.190447118	0.245	0.078265077	0.588
ASV_1113	Candidatus Aquiluna	AI	-0.516912885	0.056	0.09758182	0.587
ASV_1820	Rhodovastum	AI	-0.653706526	0.012	0.072249271	0.585
ASV_2098	Thiophaeococcus	AI	-0.54834875	0.043	0.089936476	0.582
ASV_135	NA	AI	-0.636377563	0.033	0.036317435	0.576
ASV_358	Candidatus Alysiosphaera	AI	-0.750561843	0.006	0.039146545	0.569
ASV_182	Microcystis PCC-7914	AI	-0.604394421	0.033	0.117410592	0.557
ASV_1414	Defluviicoccus	AI	-0.75869349	0.012	0.021418704	0.55
ASV_1366	Tabrizicola	AI	-0.798897572	0.006	0.045964198	0.544
ASV_2416	NA	AI	-0.637380056	0.025	0.001610001	0.542
ASV_1156	Roseomonas	AI	-0.600816589	0.027	0.08062758	0.536
ASV_1590	Labrenzia	AI	-0.774634295	0.001	0.047105629	0.534
ASV_599	Candidatus Thiobios	AI	-0.614819162	0.018	0.031762028	0.533
ASV_379	NA	AI	-0.71467661	0.016	0.003058373	0.531
ASV_3187	Hyphomicrobium	AI	-0.572010131	0.045	0.057499507	0.523
ASV_1598	Hydrogenophaga	AI	-0.149453312	0.284	0.013486383	0.522
ASV_57	Aeromonas	AI	-0.391924083	0.096	0.053795188	0.522
ASV_818	Synechocystis SAG 90.79	AI	-0.574495192	0.037	0.016151007	0.514
ASV_1389	NA	AI	-0.761472556	0.004	-0.015620941	0.511
ASV_162	Shewanella	AI	-0.681492006	0.011	-0.02180298	0.511
ASV_65	Clostridium sensu stricto 1	AI	-0.592308067	0.018	-0.004088765	0.507
ASV_1353	NA	AI	-0.814708873	0.002	0.0017691	0.503
ASV_2822	Hydrogenophaga	AI	-0.858137426	0.005	-0.002085282	0.502
ASV_1406	NA	AI	-0.876287205	0.001	0.00029834	0.495
ASV_373	Cyanobium PCC-6307	AI	-0.697710968	0.022	-0.017189102	0.487
ASV_263	Arthrospira PCC-7345	AI	-0.67783961	0.007	-0.025025035	0.485
ASV_488	NA	AI	-0.707113165	0.018	-0.017195878	0.484
ASV_703	Synechocystis SAG 90.79	AI	-0.661184627	0.019	-0.029611132	0.464
ASV_3123	Gloeocapsa	AI	-0.740190184	0.009	-0.023657945	0.461
ASV_100	Aeromonas	AI	-0.370197777	0.086	-0.025323001	0.454
ASV_1435	Candidatus Gigarickettsia	AI	-0.657032407	0.019	-0.049635874	0.452
ASV_1550	Thiocapsa	AI	-0.715889525	0.013	-0.051589198	0.441
ASV_1989	Bacillus	AI	-0.793658194	0.006	-0.11264425	0.438
ASV_1751	Candidatus Competibacter	AI	-0.632615478	0.023	-0.072583408	0.437
ASV_3050	Sulfurimonas	AI	-0.335685904	0.156	-0.071393094	0.434
ASV_244	NA	AI	-0.829922006	0.006	-0.059731199	0.424
ASV_2162	Caedibacter	AI	-0.323056583	0.136	-0.11589477	0.422
ASV_43	Vibrio	AI	-0.38703987	0.085	0.001973771	0.42
ASV_990	Microcystis PCC-7914	AI	-0.813603056	0.003	-0.06525902	0.419
ASV_1083	Roseobacter clade CHAB-I-5 lineage	AI	-0.766540087	0.008	-0.079811847	0.416
ASV_1556	Clostridium sensu stricto 1	AI	-0.528823599	0.04	-0.120398448	0.412
ASV_155	Bacillus	AI	-0.552870028	0.021	-0.053065201	0.407
ASV_2233	Synechocystis PCC-6803	AI	-0.791415696	0.004	-0.126383326	0.404
ASV_3642	Desulfovirga	AI	-0.483446505	0.056	-0.104253007	0.398
ASV_257	Rubribacterium	AI	-0.788562024	0.006	-0.076203721	0.395
ASV_3727	NA	AI	-0.84174631	0.006	-0.143081272	0.395
ASV_776	NA	AI	-0.165404697	0.285	-0.117587301	0.393
ASV_1377	Roseomonas	AI	-0.73782373	0.009	-0.078607643	0.392
ASV_1819	Tabrizicola	AI	-0.858130057	0.005	-0.170582575	0.39
ASV_812	Planococcus	AI	-0.671593916	0.017	-0.063005118	0.39
ASV_1128	Candidatus Contendobacter	AI	-0.589166825	0.037	-0.120561282	0.389
ASV_132	Roseofilum AO1-A	AI	-0.326843568	0.12	-0.087045582	0.38
ASV_2426	NA	AI	-0.672359703	0.014	-0.140184046	0.379
ASV_1223	NA	AI	-0.855160948	0.005	-0.146747445	0.373
ASV_2383	Terrimicrobium	AI	-0.677852399	0.018	-0.144333028	0.373
ASV_1965	NA	AI	-0.540664481	0.044	-0.134414563	0.372
ASV_554	Rubellimicrobium	AI	-0.695809509	0.009	-0.122329572	0.371
ASV_753	NA	AI	-0.577829182	0.036	-0.164372358	0.366
ASV_1745	Candidatus Planktoluna	AI	-0.331387592	0.152	-0.183200987	0.36
ASV_2109	Caedibacter	AI	-0.219739739	0.23	-0.149181785	0.359
ASV_423	Clostridium sensu stricto 1	AI	-0.760631017	0.013	-0.204023293	0.357
ASV_81	Pseudomonas	AI	-0.309180703	0.161	-0.186679342	0.356
ASV_167	Tabrizicola	AI	-0.751115295	0.006	-0.101347206	0.353
ASV_1861	NA	AI	-0.76041612	0.008	-0.129113767	0.353
ASV_913	Nordella	AI	-0.744654562	0.013	-0.195214061	0.353
ASV_325	NA	AI	-0.648590719	0.028	-0.090719716	0.347
ASV_991	Tabrizicola	AI	-0.782061437	0.005	-0.214837948	0.347
ASV_1112	Nodosilinea PCC-7104	AI	-0.474595563	0.065	-0.165395099	0.345
ASV_288	NA	AI	-0.99793195	0	-0.153216396	0.343
ASV_1188	Aminobacter	AI	-0.65040073	0.024	-0.152018715	0.341
ASV_1319	Labrenzia	AI	-0.781890253	0.012	-0.226154128	0.339
ASV_2	Aeromonas	AI	-0.179955197	0.307	-0.065197253	0.337
ASV_2902	Microcystis PCC-7914	AI	-0.768278022	0.01	-0.228112899	0.336
ASV_2579	Rubellimicrobium	AI	-0.76697332	0.011	-0.237078561	0.335
ASV_53	Aeromonas	AI	-0.70486158	0.01	-0.071197187	0.335
ASV_70	Romboutsia	AI	-0.531388393	0.035	-0.155084114	0.335
ASV_1127	Methanolinea	AI	-0.790348959	0.009	-0.234068417	0.328
ASV_967	Tropicimonas	AI	-0.724066981	0.01	-0.114750119	0.328
ASV_2690	NA	AI	-0.641935312	0.023	-0.205052596	0.327
ASV_1114	Dechloromonas	AI	-0.231867818	0.235	-0.246303861	0.317
ASV_1572	Tropicimonas	AI	-0.762780317	0.007	-0.266850005	0.317
ASV_9	Aeromonas	AI	-0.546741275	0.039	-0.1384607	0.316
ASV_19	Paraclostridium	AI	-0.476821121	0.034	-0.141242301	0.314
ASV_932	Candidatus Alysiosphaera	AI	-0.783641492	0.006	-0.206624605	0.31
ASV_93	NA	AI	-0.642083011	0.018	-0.157181728	0.309
ASV_1512	Planococcus	AI	-0.854681158	0.001	-0.273132803	0.308
ASV_2213	Roseitalea	AI	-0.782657475	0.008	-0.265348235	0.308
ASV_480	Terrimicrobium	AI	-0.617268385	0.017	-0.222612307	0.305
ASV_1068	Thiocapsa	AI	-0.916643798	0.001	-0.245553411	0.304
ASV_1383	Bacillus	AI	-0.587320598	0.022	-0.184372592	0.303
ASV_1225	Luteolibacter	AI	-0.631354996	0.024	-0.215245468	0.302
ASV_2024	Aurantisolimonas	AI	-0.833392727	0.002	-0.149314331	0.298
ASV_847	Luteolibacter	AI	-0.649617079	0.012	-0.19332459	0.296
ASV_1291	NA	AI	-0.776398284	0.006	-0.244728503	0.295
ASV_1021	Methylocaldum	AI	-0.713619503	0.014	-0.188421104	0.294
ASV_2706	Levilinea	AI	-0.68209513	0.015	-0.24644859	0.294
ASV_2977	NA	AI	-0.609379753	0.03	-0.273750979	0.294
ASV_656	Rubellimicrobium	AI	-0.818108036	0.006	-0.143851747	0.294
ASV_2190	NA	AI	-0.652547503	0.014	-0.230926172	0.293
ASV_3115	NA	AI	-0.741964872	0.013	-0.296854651	0.292
ASV_1030	NA	AI	-0.910223626	0.001	-0.291408625	0.288
ASV_482	NA	AI	-0.407722941	0.101	-0.276134959	0.288
ASV_2169	Desulforhopalus	AI	-0.799973379	0.007	-0.314322743	0.285
ASV_432	Tabrizicola	AI	-0.929004813	0	-0.184160488	0.285
ASV_1063	NA	AI	-0.71008502	0.016	-0.229302749	0.284
ASV_2259	Salinarimonas	AI	-0.906590319	0.001	-0.26308834	0.284
ASV_1878	Luteolibacter	AI	-0.637884616	0.017	-0.221176427	0.283
ASV_5392	Aquisphaera	AI	-0.703374106	0.016	-0.254767601	0.277
ASV_421	Staphylococcus	AI	-0.755012879	0.012	-0.338177217	0.273
ASV_1587	Thiocapsa	AI	-0.71408015	0.018	-0.242129169	0.272
ASV_627	Rhodovulum	AI	-0.671804995	0.009	-0.170906929	0.271
ASV_740	Leptolyngbya ANT.L52.2	AI	-0.756194475	0.004	-0.284655385	0.271
ASV_1459	Sandaracinobacter	AI	-0.700634401	0.012	-0.272422605	0.27
ASV_1682	Rubellimicrobium	AI	-0.758420407	0.008	-0.326720557	0.27
ASV_3845	Candidatus Xiphinematobacter	AI	-0.61193695	0.027	-0.369550057	0.265
ASV_5388	Candidatus Competibacter	AI	-0.744310436	0.01	-0.371402413	0.264
ASV_27	Limnothrix	AI	-0.474294555	0.075	-0.147012424	0.26
ASV_767	Chryseobacterium	AI	-0.766790264	0.013	-0.385557898	0.26
ASV_2466	Desulfobacca	AI	-0.60578209	0.026	-0.268465961	0.258
ASV_1247	NA	AI	-0.984274335	0.002	-0.320080012	0.256
ASV_227	Chitinibacter	AI	-0.536985894	0.022	-0.242300886	0.256
ASV_1665	NA	AI	-0.864495069	0.005	-0.300359817	0.254
ASV_5	Vibrio	AI	-0.195241549	0.28	-0.095770824	0.254
ASV_1035	Sandaracinobacter	AI	-0.607792307	0.042	-0.251930379	0.25
ASV_3827	NA	AI	-0.812544215	0.011	-0.385962898	0.248
ASV_3	Cetobacterium	AI	-0.453507038	0.05	-0.13894169	0.246
ASV_28	Plesiomonas	AI	-0.300587482	0.129	-0.193291049	0.245
ASV_503	Paralcaligenes	AI	-0.75191339	0.01	-0.378076024	0.245
ASV_99	Candidatus Bacilloplasma	AI	-0.51141187	0.05	-0.323701145	0.239
ASV_208	NA	AI	-0.744494883	0.009	-0.168348161	0.238
ASV_888	Tabrizicola	AI	-0.846692363	0.004	-0.373117045	0.238
ASV_602	Azoarcus	AI	-0.857384959	0.007	-0.420149433	0.231
ASV_973	Seohaeicola	AI	-0.757813453	0.009	-0.370425153	0.23
ASV_272	NA	AI	-0.482353101	0.044	-0.265467559	0.227
ASV_894	Gloeocapsa	AI	-0.7280172	0.01	-0.129726875	0.225
ASV_108	Pseudomonas	AI	-0.786570398	0.004	-0.218633764	0.224
ASV_6114	[Desulfobacterium] catecholicum group	AI	-0.717574329	0.011	-0.363919872	0.22
ASV_3623	NA	AI	-0.812349306	0.004	-0.358870346	0.218
ASV_1338	Candidatus Tammella	AI	-0.733752797	0.01	-0.405478685	0.216
ASV_1770	NA	AI	-0.89070749	0.002	-0.417063051	0.216
ASV_2043	NA	AI	-0.485171009	0.051	-0.403439212	0.214
ASV_997	Methanolinea	AI	-0.647521281	0.025	-0.373471376	0.214
ASV_1941	NA	AI	-0.736787278	0.006	-0.325573003	0.212
ASV_5258	Mycobacterium	AI	-0.825245343	0.005	-0.457527283	0.212
ASV_393	Gemmobacter	AI	-0.560096885	0.023	-0.192253128	0.211
ASV_1938	Pseudorhodobacter	AI	-0.548687553	0.039	-0.450254415	0.208
ASV_1753	Flavobacterium	AI	-0.675426658	0.016	-0.26653138	0.204
ASV_1574	Clostridium sensu stricto 11	AI	-0.459741773	0.048	-0.450373721	0.2
ASV_1006	NA	AI	-0.581520669	0.013	-0.297365125	0.199
ASV_1834	966-1	AI	-0.790161196	0.006	-0.314415698	0.199
ASV_1154	NA	AI	-0.667211047	0.027	-0.394441728	0.196
ASV_416	Terrimicrobium	AI	-0.54960173	0.028	-0.243724964	0.196
ASV_337	Bacillus	AI	-0.62977829	0.012	-0.275298932	0.194
ASV_118	Trichodesmium IMS101	AI	-0.529147978	0.038	-0.361843339	0.192
ASV_1234	NA	AI	-0.798357579	0.01	-0.468771317	0.191
ASV_1410	Roseomonas	AI	-0.754451121	0.004	-0.404540693	0.19
ASV_2077	Defluviicoccus	AI	-0.735508729	0.01	-0.168548922	0.19
ASV_810	Dinghuibacter	AI	-0.470654665	0.082	-0.402655205	0.19
ASV_1081	NA	AI	-0.719440873	0.023	-0.338163043	0.188
ASV_2564	NA	AI	-0.570011442	0.041	-0.418930118	0.185
ASV_342	Candidatus Thiosymbion	AI	-0.55499941	0.039	-0.354830649	0.185
ASV_1199	NA	AI	-0.854819487	0.001	-0.341555693	0.182
ASV_1961	NA	AI	-0.768046367	0.009	-0.427356003	0.182
ASV_2547	Desulfovirga	AI	-0.563928138	0.047	-0.459994161	0.181
ASV_649	NA	AI	-0.762122075	0.018	-0.492015414	0.178
ASV_995	Cyanobium PCC-6307	AI	-0.679684906	0.01	-0.33113372	0.178
ASV_2772	NA	AI	-0.506554065	0.063	-0.350199201	0.177
ASV_3372	Tabrizicola	AI	-0.89981904	0.002	-0.473798908	0.177
ASV_711	Tabrizicola	AI	-0.746828978	0.013	-0.480425053	0.175
ASV_1177	ZOR0006	AI	-0.565437706	0.05	-0.479604274	0.174
ASV_476	Phormidium IAM M-71	AI	-0.706271577	0.01	-0.257557765	0.173
ASV_1026	Exiguobacterium	AI	-0.569253769	0.028	-0.359691289	0.171
ASV_842	Bacillus	AI	-0.38246491	0.093	-0.39179237	0.17
ASV_6	Mycoplasma	AI	-0.151600323	0.285	-0.361012023	0.169
ASV_545	NA	AI	-0.685088904	0.018	-0.184958058	0.168
ASV_1364	NA	AI	-0.75366104	0.007	-0.473861206	0.166
ASV_62	Romboutsia	AI	-0.506630224	0.031	-0.406260237	0.166
ASV_3877	Longivirga	AI	-0.661143494	0.009	-0.562937991	0.163
ASV_200	Thiocapsa	AI	-0.58695425	0.049	-0.224975201	0.159
ASV_1677	NA	AI	-0.395753105	0.087	-0.331661063	0.157
ASV_246	Clostridium sensu stricto 1	AI	-0.761570688	0.01	-0.564655211	0.156
ASV_1206	Candidatus Chlorothrix	AI	-0.681831388	0.016	-0.399161046	0.153
ASV_583	Rubribacterium	AI	-0.804711919	0.002	-0.442837671	0.151
ASV_1811	Rubribacterium	AI	-0.847295873	0	-0.535829668	0.15
ASV_285	NA	AI	-0.551641654	0.044	-0.255616852	0.15
ASV_1312	NA	AI	-0.597752993	0.018	-0.33953813	0.148
ASV_414	Luteolibacter	AI	-0.727578872	0.012	-0.289832838	0.147
ASV_1061	Rubribacterium	AI	-0.83357908	0.002	-0.383816406	0.146
ASV_1171	NA	AI	-0.539604266	0.036	-0.305326069	0.144
ASV_1040	Luteolibacter	AI	-0.897912851	0	-0.363541646	0.142
ASV_352	Methanobacterium	AI	-0.649751108	0.021	-0.405291569	0.141
ASV_696	Sandaracinobacter	AI	-0.504900281	0.047	-0.342762847	0.141
ASV_1937	Terrimicrobium	AI	-0.725775126	0.005	-0.590098594	0.136
ASV_148	Microcystis PCC-7914	AI	-0.816419005	0.003	-0.267951055	0.135
ASV_958	Candidatus Chlorothrix	AI	-0.751817586	0.007	-0.20346472	0.135
ASV_399	Oceanicella	AI	-0.603078036	0.032	-0.320943048	0.134
ASV_3438	Rhodobacter	AI	-0.601469608	0.036	-0.517351563	0.133
ASV_1419	Rhodopirellula	AI	-0.741159785	0.007	-0.281738741	0.131
ASV_585	Paeniclostridium	AI	-0.733523119	0.005	-0.593199941	0.131
ASV_1133	Ilumatobacter	AI	-0.588903006	0.025	-0.46826387	0.129
ASV_3531	NA	AI	-0.595937312	0.024	-0.567673875	0.129
ASV_879	NA	AI	-0.633658534	0.025	-0.265187463	0.128
ASV_2839	NA	AI	-0.713693203	0.016	-0.417649956	0.126
ASV_1267	NA	AI	-0.650359637	0.011	-0.442195744	0.125
ASV_1041	Terrimicrobium	AI	-0.7275218	0.007	-0.407972137	0.122
ASV_7571	Candidatus Competibacter	AI	-0.515957352	0.042	-0.513173086	0.122
ASV_433	Aurantisolimonas	AI	-0.755646298	0.005	-0.384209197	0.121
ASV_650	Chloronema	AI	-0.553644073	0.036	-0.386730942	0.121
ASV_1653	Luteolibacter	AI	-0.772698774	0.003	-0.356303584	0.119
ASV_547	Luteolibacter	AI	-0.544044249	0.036	-0.225414754	0.118
ASV_459	Defluviicoccus	AI	-0.708264393	0.022	-0.266648891	0.113
ASV_705	Thiocapsa	AI	-0.624368941	0.018	-0.294207226	0.113
ASV_1615	Aurantisolimonas	AI	-0.633107437	0.019	-0.481640433	0.112
ASV_2337	Haloferula	AI	-0.807840492	0.002	-0.530230098	0.112
ASV_173	Cetobacterium	AI	-0.613721846	0.027	-0.592545614	0.111
ASV_193	NA	AI	-0.761471379	0.012	-0.374567359	0.108
ASV_1884	Terrimicrobium	AI	-0.68112991	0.03	-0.341650702	0.106
ASV_2860	NA	AI	-0.561070734	0.043	-0.622817845	0.106
ASV_1	Mycoplasma	AI	-0.375815372	0.085	-0.444320263	0.105
ASV_2363	Nostoc PCC-7107	AI	-0.805376371	0.009	-0.733594674	0.103
ASV_634	Algoriphagus	AI	-0.822254877	0.003	-0.501793083	0.103
ASV_2143	Limibaculum	AI	-0.516483908	0.06	-0.527773934	0.099
ASV_2742	Luteolibacter	AI	-0.783114472	0.008	-0.726415392	0.099
ASV_434	NA	AI	-0.743741161	0.009	-0.707017329	0.098
ASV_306	Phormidium IAM M-71	AI	-0.486424111	0.072	-0.473884929	0.092
ASV_343	Escherichia-Shigella	AI	-0.348288609	0.106	-0.54014874	0.092
ASV_590	NA	AI	-0.766839705	0.011	-0.365116602	0.091
ASV_11	Aeromonas	AI	-0.132027893	0.343	-0.363580108	0.089
ASV_1331	Nocardioides	AI	-0.736735954	0.013	-0.625115046	0.089
ASV_4204	Roseomonas	AI	-0.726030034	0.008	-0.653770091	0.089
ASV_3079	NA	AI	-0.571326399	0.039	-0.591947005	0.088
ASV_361	Candidatus Chlorothrix	AI	-0.644969723	0.033	-0.669090364	0.087
ASV_898	NA	AI	-0.499316457	0.059	-0.709264286	0.087
ASV_232	Haematospirillum	AI	-0.384178121	0.101	-0.600829478	0.086
ASV_286	Tabrizicola	AI	-0.858886275	0.003	-0.200061928	0.085
ASV_68	Shewanella	AI	-0.309475583	0.16	-0.307115165	0.084
ASV_625	Luteolibacter	AI	-0.796059374	0.007	-0.466678334	0.082
ASV_1774	Methanolinea	AI	-0.589207583	0.028	-0.579775889	0.081
ASV_1902	Hyphomicrobium	AI	-0.572516625	0.04	-0.534343185	0.08
ASV_1462	P3OB-42	AI	-0.678002961	0.018	-0.497630545	0.079
ASV_1516	Hoeflea	AI	-0.550008067	0.047	-0.663027418	0.078
ASV_230	NA	AI	-0.578151037	0.018	-0.318109769	0.078
ASV_571	NA	AI	-0.764781332	0.006	-0.51151126	0.078
ASV_262	Thiohalocapsa	AI	-0.726735676	0.015	-0.593659907	0.077
ASV_326	Amaricoccus	AI	-0.791300763	0.004	-0.413278408	0.074
ASV_269	Thiorhodovibrio	AI	-0.415778658	0.084	-0.38777097	0.073
ASV_467	Clostridium sensu stricto 1	AI	-0.630868666	0.025	-0.52241575	0.073
ASV_1369	Pseudomonas	AI	-0.483110244	0.054	-0.650412785	0.072
ASV_867	Candidatus Chloroploca	AI	-0.58597906	0.038	-0.50011003	0.072
ASV_225	Candidatus Alysiosphaera	AI	-0.631776845	0.031	-0.399048729	0.071
ASV_508	Microcystis PCC-7914	AI	-0.607381688	0.034	-0.603877309	0.071
ASV_188	Rubrimonas	AI	-0.713684324	0.011	-0.452826493	0.07
ASV_653	Bacillus	AI	-0.521840024	0.044	-0.540665847	0.07
ASV_1321	Allorhizobium-Neorhizobium-Pararhizobium-Rhizobium	AI	-0.551034594	0.045	-0.570914525	0.069
ASV_3532	SM1A02	AI	-0.540141806	0.046	-0.540640178	0.069
ASV_1517	NA	AI	-0.624798708	0.035	-0.33923657	0.068
ASV_1637	Lentimicrobium	AI	-0.737299866	0.007	-0.655116396	0.068
ASV_59	Pseudomonas	AI	-0.694158505	0.015	-0.667442615	0.068
ASV_721	Cyanobium PCC-6307	AI	-0.416845073	0.076	-0.613761471	0.068
ASV_1472	NA	AI	-0.455408132	0.055	-0.596981011	0.067
ASV_2201	NA	AI	-0.499168437	0.061	-0.683257189	0.067
ASV_76	Synechococcus MBIC10613	AI	-0.655275076	0.019	-0.396227588	0.064
ASV_357	NA	AI	-0.902749196	0.002	-0.778983486	0.063
ASV_738	Desulforhopalus	AI	-0.807492337	0.004	-0.39676138	0.063
ASV_825	Candidatus Bacilloplasma	AI	-0.753875194	0.003	-0.73372482	0.063
ASV_1772	NA	AI	-0.564173118	0.038	-0.71657589	0.062
ASV_218	Rubribacterium	AI	-0.876542451	0.002	-0.215654168	0.061
ASV_1116	NA	AI	-0.756579463	0.006	-0.819219733	0.059
ASV_845	NA	AI	-0.423582958	0.093	-0.320279063	0.059
ASV_220	Bacillus	AI	-0.651880173	0.006	-0.464263571	0.057
ASV_2674	Ferruginibacter	AI	-0.686300692	0.011	-0.861075896	0.056
ASV_4617	NA	AI	-0.800056546	0.005	-0.610050618	0.056
ASV_2896	NA	AI	-0.438075133	0.075	-0.46540763	0.054
ASV_928	NA	AI	-0.422715149	0.047	-0.467130556	0.054
ASV_1444	NA	AI	-0.651548326	0.022	-1.029596197	0.053
ASV_377	Roseomonas	AI	-0.833755363	0.003	-0.296241009	0.05
ASV_206	Tropicimonas	AI	-0.631217488	0.005	-0.451506261	0.049
ASV_2842	NA	AI	-0.5156735	0.045	-0.881614025	0.049
ASV_3801	Terrimicrobium	AI	-0.531075256	0.041	-0.865119552	0.048
ASV_489	Desulforhopalus	AI	-0.389864644	0.1	-0.429822236	0.047
ASV_713	Methanolinea	AI	-0.768484904	0.005	-0.732954419	0.047
ASV_912	Pseudorhodoplanes	AI	-0.868018307	0.003	-0.943052897	0.047
ASV_1716	Breznakia	AI	-0.59289252	0.028	-1.103702775	0.046
ASV_1881	Luteolibacter	AI	-0.737336943	0.013	-0.590770769	0.046
ASV_2744	Pedomicrobium	AI	-0.581650007	0.035	-0.911042404	0.046
ASV_251	Cyanobium PCC-6307	AI	-0.843488058	0.003	-0.56704209	0.045
ASV_1149	Terrimicrobium	AI	-0.711762208	0.013	-0.216481743	0.044
ASV_899	Rubribacterium	AI	-0.718624082	0.007	-0.726734952	0.044
ASV_1140	Rubribacterium	AI	-0.753377344	0.01	-0.524437977	0.043
ASV_1663	Oceanicella	AI	-0.572832981	0.017	-0.572367541	0.042
ASV_300	NA	AI	-0.779309897	0.01	-0.400598058	0.042
ASV_677	NA	AI	-0.705912949	0.015	-0.407565808	0.042
ASV_8473	Microvirga	AI	-0.743322861	0.01	-0.851162582	0.042
ASV_577	Bacillus	AI	-0.589211793	0.033	-0.379887184	0.041
ASV_697	NA	AI	-0.643312312	0.02	-0.621198892	0.041
ASV_808	Cyanobium PCC-6307	AI	-0.510226126	0.055	-0.705502666	0.04
ASV_1764	966-1	AI	-0.717050844	0.014	-0.420522633	0.039
ASV_25	Vibrio	AI	-0.418971203	0.095	-0.687826239	0.039
ASV_3251	NA	AI	-0.656609511	0.024	-0.593212878	0.038
ASV_3280	Roseicyclus	AI	-0.496645127	0.065	-0.88545066	0.038
ASV_637	Terrimicrobium	AI	-0.516823856	0.026	-0.547661074	0.038
ASV_226	Tropicimonas	AI	-0.813521639	0.001	-0.39435481	0.037
ASV_1646	Candidatus Chlorothrix	AI	-0.655011323	0.022	-0.841533052	0.035
ASV_1680	Porphyrobacter	AI	-0.386309409	0.104	-0.643699206	0.035
ASV_4423	Desulfomonile	AI	-0.610414512	0.027	-0.897257309	0.035
ASV_598	Luteolibacter	AI	-0.693135375	0.007	-0.699078032	0.034
ASV_804	Candidatus Chlorothrix	AI	-0.593715659	0.041	-0.521941072	0.034
ASV_1849	Candidatus Accumulibacter	AI	-0.665747553	0.016	-0.735115279	0.033
ASV_1166	NA	AI	-0.412333134	0.089	-0.70921824	0.032
ASV_1670	Luteolibacter	AI	-0.757400328	0.018	-0.870844612	0.032
ASV_3063	Ideonella	AI	-0.740736554	0.014	-1.176575046	0.032
ASV_338	Terrimicrobium	AI	-0.677037138	0.008	-0.569754617	0.031
ASV_133	Bacillus	AI	-0.315573329	0.128	-0.613652781	0.03
ASV_551	Methylocaldum	AI	-0.666513321	0.017	-0.486702197	0.03
ASV_154	NA	AI	-0.609909846	0.036	-0.476295792	0.028
ASV_1728	Elioraea	AI	-0.727790607	0.009	-0.911481138	0.028
ASV_303	NA	AI	-0.659216361	0.007	-0.439591572	0.028
ASV_3891	Legionella	AI	-0.717300467	0.009	-0.803520547	0.028
ASV_1564	Candidatus Alysiosphaera	AI	-0.688689851	0.007	-0.57353094	0.027
ASV_276	NA	AI	-0.842201787	0.003	-0.48812887	0.027
ASV_283	Dinghuibacter	AI	-0.72208426	0	-0.411851877	0.027
ASV_949	Roseomonas	AI	-0.828546604	0.003	-0.722063333	0.027
ASV_1673	NA	AI	-0.627615301	0.042	-0.747532876	0.026
ASV_2299	Desulfobacca	AI	-0.618670634	0.029	-0.995855179	0.026
ASV_441	Luteolibacter	AI	-0.714900984	0.015	-1.155941229	0.026
ASV_90	Spirulina CCC Snake P-Y-85	AI	-0.573763016	0.03	-0.413321481	0.025
ASV_934	Rhodobacter	AI	-0.605990385	0.048	-0.853383181	0.024
ASV_935	Desulfovirga	AI	-0.777528722	0.007	-0.483806845	0.024
ASV_1814	NA	AI	-0.637062574	0.022	-0.814711525	0.023
ASV_287	Desulforhopalus	AI	-0.7033543	0.017	-0.607372867	0.023
ASV_544	Rubribacterium	AI	-0.54273393	0.022	-0.64841602	0.023
ASV_861	NA	AI	-0.725712167	0.01	-0.696547115	0.023
ASV_415	Rubribacterium	AI	-0.866851757	0	-0.963791693	0.022
ASV_589	Desulforhopalus	AI	-0.667748339	0.007	-0.857204611	0.022
ASV_758	Terrimicrobium	AI	-0.410496955	0.071	-0.778318418	0.022
ASV_1625	NA	AI	-0.462803293	0.085	-0.920277084	0.021
ASV_860	Thiocapsa	AI	-0.510460404	0.063	-0.473234693	0.021
ASV_1295	NA	AI	-0.887432288	0.003	-0.978842674	0.02
ASV_199	Paracoccus	AI	-0.571472322	0.035	-1.003504062	0.02
ASV_430	Aurantisolimonas	AI	-0.630427603	0.027	-0.640687022	0.02
ASV_474	Luteolibacter	AI	-0.3517403	0.128	-0.54839481	0.02
ASV_2515	NA	AI	-0.671000453	0.021	-0.670360297	0.019
ASV_1039	Methanosaeta	AI	-0.554916465	0.041	-0.65561465	0.018
ASV_1933	Tabrizicola	AI	-0.700312859	0.02	-0.861936801	0.018
ASV_824	Luteolibacter	AI	-0.76953231	0.009	-0.97236337	0.017
ASV_970	Synechococcus CC9902	AI	-0.483409452	0.071	-0.853324486	0.017
ASV_1396	Luteolibacter	AI	-0.597369174	0.038	-0.856305215	0.016
ASV_2349	NA	AI	-0.721739752	0.012	-1.308024768	0.016
ASV_41	Aeromonas	AI	-0.461767349	0.036	-0.84911004	0.016
ASV_120	Cyanobium PCC-6307	AI	-0.600311708	0.027	-0.595908776	0.015
ASV_1262	NA	AI	-0.773932205	0.009	-0.59941551	0.015
ASV_1397	NA	AI	-0.660643152	0.009	-0.962206326	0.014
ASV_229	Cyanobium PCC-6307	AI	-0.478794092	0.062	-0.616652597	0.014
ASV_690	Roseomonas	AI	-0.865410609	0	-0.826939979	0.014
ASV_588	Merismopedia 0BB39S01	AI	-0.737040119	0.004	-0.563552743	0.013
ASV_593	Luteolibacter	AI	-0.740453462	0.011	-0.74496981	0.013
ASV_117	Tabrizicola	AI	-0.668166362	0.019	-0.432245456	0.012
ASV_1197	Rubellimicrobium	AI	-0.821133733	0.001	-1.24898382	0.012
ASV_1257	Lactococcus	AI	-0.433515295	0.075	-0.762953842	0.012
ASV_1588	Sumerlaea	AI	-0.788209744	0.007	-1.168071846	0.012
ASV_391	Synechocystis PCC-6803	AI	-0.592268239	0.02	-0.453216622	0.012
ASV_680	Terrimicrobium	AI	-0.466141424	0.076	-0.584905664	0.012
ASV_720	Gemmobacter	AI	-0.68655953	0.015	-1.224675993	0.012
ASV_195	Bacillus	AI	-0.444162538	0.06	-0.47961733	0.011
ASV_278	Rubribacterium	AI	-0.727045741	0.013	-0.362507075	0.011
ASV_559	NA	AI	-0.817177603	0.011	-0.98743463	0.011
ASV_217	Bacillus	AI	-0.758106462	0.002	-0.589596824	0.01
ASV_565	Candidatus Chlorothrix	AI	-0.662453704	0.016	-0.506612716	0.01
ASV_1097	Luteolibacter	AI	-0.700975831	0.019	-1.120933782	0.009
ASV_1535	NA	AI	-0.609461984	0.03	-0.938174262	0.009
ASV_1600	NA	AI	-0.603235201	0.032	-0.670789787	0.009
ASV_1584	Brevundimonas	AI	-0.549305901	0.039	-1.237804509	0.008
ASV_243	Clostridium sensu stricto 1	AI	-0.459096182	0.06	-1.301005806	0.008
ASV_259	Cyanobium PCC-6307	AI	-0.498506575	0.029	-0.597077396	0.008
ASV_983	NA	AI	-0.751309918	0.012	-0.747662361	0.008
ASV_1434	Parabacteroides	AI	-0.502590701	0.065	-1.220501854	0.007
ASV_3212	Holospora	AI	-0.537301502	0.037	-1.338499596	0.007
ASV_455	Rubellimicrobium	AI	-0.770037186	0.004	-0.519497418	0.007
ASV_691	Thiorhodovibrio	AI	-0.553794466	0.042	-1.138954984	0.007
ASV_765	NA	AI	-0.619763141	0.026	-0.858705219	0.007
ASV_253	Terrimicrobium	AI	-0.535418786	0.033	-0.789035581	0.006
ASV_412	Terrimicrobium	AI	-0.59977132	0.024	-0.74009538	0.006
ASV_870	NA	AI	-0.584769026	0.019	-1.315705442	0.006
ASV_2427	Defluviicoccus	AI	-0.722012469	0.017	-0.796710739	0.005
ASV_390	NA	AI	-0.580830222	0.033	-1.279687689	0.005
ASV_841	Phormidium MBIC10003	AI	-0.558412509	0.039	-0.85445902	0.005
ASV_998	Pseudomonas	AI	-0.795642098	0.006	-0.853570753	0.005
ASV_203	Algoriphagus	AI	-0.66654925	0.009	-1.019329884	0.004
ASV_2399	Aeromicrobium	AI	-0.695164895	0.023	-1.141954838	0.004
ASV_2437	Sandaracinobacter	AI	-0.806576642	0.004	-0.846599566	0.004
ASV_485	Defluviicoccus	AI	-0.566552753	0.045	-0.718442961	0.004
ASV_747	NA	AI	-0.875462865	0.002	-0.638221482	0.004
ASV_809	Dinghuibacter	AI	-0.885264497	0.002	-1.103931405	0.004
ASV_827	Nitratireductor	AI	-0.76254042	0.007	-0.635625705	0.004
ASV_1020	NA	AI	-0.652165545	0.023	-0.446789385	0.003
ASV_13	Romboutsia	AI	-0.788184505	0.006	-1.099418275	0.003
ASV_1580	Psychroglaciecola	AI	-0.799858877	0.004	-0.983918777	0.003
ASV_454	Hyphomicrobium	AI	-0.703319352	0.006	-0.986941056	0.003
ASV_925	Porphyrobacter	AI	-0.318369726	0.124	-1.099870711	0.003
ASV_1775	966-1	AI	-0.520725884	0.046	-1.034661138	0.002
ASV_2001	Kocuria	AI	-0.70762445	0.009	-1.052111484	0.002
ASV_420	Sva0081 sediment group	AI	-0.589265829	0.04	-0.728308982	0.002
ASV_425	Terrimicrobium	AI	-0.493297811	0.06	-0.695127146	0.002
ASV_574	NA	AI	-0.797678672	0.003	-0.775633365	0.002
ASV_1207	Defluviicoccus	AI	-0.655201667	0.02	-1.08092032	0.001
ASV_1345	Cryomorpha	AI	-0.686308346	0.008	-0.935152164	0.001
ASV_324	Ilumatobacter	AI	-0.62376782	0.012	-0.898485965	0.001
ASV_436	Lentimicrobium	AI	-0.550751135	0.043	-0.892002339	0.001
ASV_761	Terrimicrobium	AI	-0.531345762	0.041	-0.675609381	0.001
ASV_273	Merismopedia 0BB39S01	AI	-0.552449761	0.028	-1.063446201	0
ASV_349	Candidatus Bacilloplasma	AI	-0.862157833	0.001	-1.067804711	0
ASV_613	Terrimicrobium	AI	-0.555806734	0.045	-0.689884431	0
ASV_750	LD29	AI	-0.603511375	0.027	-0.778361537	0
ASV_1880	Methyloparacoccus	GH	-0.622881832	0.009	0.838153668	0.998
ASV_1119	Thauera	GH	-0.533177434	0.035	1.120364212	0.978
ASV_6	Mycoplasma	GH	-0.187061635	0.231	0.607463305	0.978
ASV_1437	NA	GH	-0.810451075	0.003	0.812672408	0.968
ASV_2538	Desulfatiglans	GH	-0.552182014	0.028	0.352941575	0.959
ASV_2020	Azovibrio	GH	-0.453145516	0.065	0.32806834	0.952
ASV_2930	Desulfobacca	GH	-0.464971122	0.071	0.787428922	0.919
ASV_3179	Luteitalea	GH	-0.421571438	0.071	0.920374628	0.916
ASV_1671	Luteolibacter	GH	-0.426284248	0.067	0.263373525	0.913
ASV_2883	Propionivibrio	GH	-0.540939334	0.029	0.730547062	0.912
ASV_54	Vibrio	GH	-0.488856021	0.064	0.812694595	0.892
ASV_2623	Desulfobulbus	GH	-0.487584475	0.058	0.836838457	0.888
ASV_161	Vibrio	GH	-0.496050279	0.055	0.779075708	0.879
ASV_1334	Butyrivibrio	GH	-0.579677395	0.036	0.520381234	0.876
ASV_564	Epulopiscium	GH	-0.472056713	0.053	0.669238709	0.874
ASV_1440	Desulfovibrio	GH	-0.410138721	0.074	0.764395426	0.871
ASV_963	Pseudarcobacter	GH	-0.460194112	0.062	0.724795605	0.867
ASV_1054	Brevinema	GH	-0.476183506	0.054	0.659321257	0.865
ASV_3613	Clostridium sensu stricto 6	GH	-0.509666962	0.045	0.55060633	0.863
ASV_1540	NA	GH	-0.767080578	0.004	0.180819428	0.856
ASV_467	Clostridium sensu stricto 1	GH	-0.555549191	0.026	0.253123044	0.856
ASV_658	Proteocatella	GH	-0.412707992	0.071	0.440803116	0.855
ASV_390	NA	GH	-0.539536765	0.028	0.645265937	0.85
ASV_4399	Luteolibacter	GH	-0.447146806	0.054	0.499397354	0.838
ASV_685	NA	GH	-0.507716119	0.054	0.542372933	0.836
ASV_2161	Exiguobacterium	GH	-0.441203763	0.073	0.382829364	0.825
ASV_1257	Lactococcus	GH	-0.337008879	0.126	0.385451305	0.822
ASV_10	Lawsonia	GH	-0.295580049	0.144	0.316978315	0.819
ASV_350	Lyngbya PCC-7419	GH	-0.762766585	0.004	0.533567675	0.819
ASV_159	Propionispira	GH	-0.433070324	0.069	0.412093582	0.815
ASV_520	NA	GH	-0.654909828	0.011	0.167026534	0.813
ASV_959	BD1-7 clade	GH	-0.562873125	0.03	0.215360682	0.807
ASV_1999	Desulfobulbus	GH	-0.471865163	0.051	0.505099921	0.79
ASV_1223	NA	GH	-0.578826505	0.027	0.143666479	0.766
ASV_1679	NA	GH	-0.610703316	0.018	0.260149269	0.766
ASV_1107	NA	GH	-0.68904748	0.009	0.21508085	0.765
ASV_1256	[Desulfobacterium] catecholicum group	GH	-0.423860129	0.075	0.334363575	0.753
ASV_689	Ellin6067	GH	-0.550855023	0.027	0.19255959	0.739
ASV_1929	Nodosilinea PCC-7104	GH	-0.574433019	0.03	0.355418639	0.736
ASV_2757	Propionivibrio	GH	-0.595384242	0.03	0.277042494	0.726
ASV_20	Enterobacter	GH	-0.642710127	0.008	0.385269233	0.724
ASV_1118	Dysgonomonas	GH	-0.379898256	0.086	0.42633054	0.712
ASV_1809	BD1-7 clade	GH	-0.618367382	0.02	0.290432116	0.711
ASV_611	NA	GH	-0.711593096	0.003	0.174271832	0.701
ASV_387	Thauera	GH	-0.532660845	0.046	0.184886308	0.697
ASV_4787	Cryptanaerobacter	GH	-0.770680132	0.004	0.126935256	0.69
ASV_786	Epulopiscium	GH	-0.596773167	0.016	0.130596475	0.688
ASV_303	NA	GH	-0.617037085	0.01	0.101734296	0.686
ASV_3309	Lawsonella	GH	-0.481276741	0.053	0.220455034	0.684
ASV_1666	Roseomonas	GH	-0.554610526	0.034	0.214240393	0.68
ASV_601	Desulfopila	GH	-0.590365772	0.017	0.232166823	0.676
ASV_1906	Sva0081 sediment group	GH	-0.613789826	0.017	0.135315427	0.674
ASV_2008	NA	GH	-0.591984744	0.016	0.129453262	0.667
ASV_3660	Luteolibacter	GH	-0.626169558	0.019	0.228060151	0.661
ASV_1568	NA	GH	-0.722060701	0.004	0.165456033	0.66
ASV_5525	Candidatus Anammoximicrobium	GH	-0.466114432	0.067	0.112224712	0.654
ASV_893	Desulfobacca	GH	-0.894046015	0.001	0.098570654	0.643
ASV_2031	Allorhizobium-Neorhizobium-Pararhizobium-Rhizobium	GH	-0.545435865	0.033	0.095757969	0.637
ASV_19	Paraclostridium	GH	-0.502503522	0.025	0.097408364	0.633
ASV_327	NA	GH	-0.495017906	0.052	0.149940063	0.629
ASV_62	Romboutsia	GH	-0.706675796	0.004	0.097290774	0.625
ASV_1983	Desulfoprunum	GH	-0.630751862	0.007	0.079860672	0.623
ASV_1477	Tabrizicola	GH	-0.464042728	0.057	0.132948965	0.611
ASV_3204	Thioclava	GH	-0.547785935	0.024	0.072586982	0.611
ASV_3466	Oceanobacter	GH	-0.466960418	0.076	0.078739769	0.611
ASV_3515	Roseomonas	GH	-0.477544375	0.071	0.131052956	0.611
ASV_883	[Desulfobacterium] catecholicum group	GH	-0.502549529	0.05	0.139370095	0.61
ASV_1304	NA	GH	-0.497952902	0.041	0.144769752	0.607
ASV_2688	Subgroup 10	GH	-0.484317087	0.054	0.133232538	0.607
ASV_3326	NA	GH	-0.504538421	0.044	0.137258068	0.597
ASV_1607	Geothermobacter	GH	-0.786435857	0.004	0.070920986	0.596
ASV_1431	Desulfobacca	GH	-0.429855224	0.074	0.059351571	0.588
ASV_1033	NA	GH	-0.827992922	0.002	0.029227582	0.585
ASV_3358	Chthonobacter	GH	-0.487811833	0.055	0.105109371	0.582
ASV_146	Citrobacter	GH	-0.471882178	0.03	0.050541935	0.58
ASV_2541	Rubritepida	GH	-0.718712149	0.007	0.03682453	0.576
ASV_1494	NA	GH	-0.595455995	0.026	0.094198589	0.575
ASV_850	Corynebacterium	GH	-0.241510158	0.193	0.080426396	0.562
ASV_84	Aeromonas	GH	-0.497176798	0.042	0.030589198	0.554
ASV_2543	Alterococcus	GH	-0.464972719	0.057	0.051397815	0.553
ASV_2832	NA	GH	-0.711211408	0.009	0.045524356	0.547
ASV_642	Corynebacterium	GH	-0.280161627	0.15	0.051926798	0.544
ASV_1121	Arcobacter	GH	-0.27993337	0.161	0.025090037	0.538
ASV_2266	Uliginosibacterium	GH	-0.470965398	0.06	0.046140827	0.534
ASV_462	Vibrio	GH	-0.56347499	0.032	0.025996674	0.53
ASV_921	Sva0081 sediment group	GH	-0.777550892	0.001	0.030873468	0.53
ASV_1353	NA	GH	-0.45303509	0.048	0.030043844	0.525
ASV_2302	NA	GH	-0.381377985	0.105	0.015088894	0.523
ASV_820	NA	GH	-0.66120075	0.011	-0.000137073	0.522
ASV_3282	Subgroup 10	GH	-0.480445495	0.052	0.02162579	0.521
ASV_360	LD29	GH	-0.752657562	0.003	-0.035949015	0.512
ASV_1034	Rhodobacter	GH	-0.298233078	0.136	-0.079258603	0.511
ASV_2199	Alicycliphilus	GH	-0.636743426	0.015	-0.013667708	0.509
ASV_6495	Paucibacter	GH	-0.459773372	0.054	0.021503441	0.507
ASV_714	NA	GH	-0.598486023	0.021	-0.084601297	0.507
ASV_1785	Formivibrio	GH	-0.250041295	0.195	-0.005957038	0.506
ASV_243	Clostridium sensu stricto 1	GH	-0.462665973	0.062	-0.006013693	0.506
ASV_474	Luteolibacter	GH	-0.643945474	0.018	0.001796456	0.506
ASV_1427	OM60(NOR5) clade	GH	-0.772176971	0.001	-0.031867085	0.496
ASV_1370	Sva0081 sediment group	GH	-0.492578104	0.025	-0.013735261	0.492
ASV_5098	Desulfococcus	GH	-0.584285532	0.025	-0.014159692	0.492
ASV_1758	NA	GH	-0.686666259	0.004	-0.028352969	0.486
ASV_268	Romboutsia	GH	-0.620137802	0.018	-0.023079481	0.486
ASV_1851	Allorhizobium-Neorhizobium-Pararhizobium-Rhizobium	GH	-0.483971734	0.06	-0.023171708	0.484
ASV_1709	NA	GH	-0.662196756	0.011	-0.039135954	0.479
ASV_2844	NA	GH	-0.250592962	0.179	-0.040587434	0.477
ASV_1026	Exiguobacterium	GH	-0.427640866	0.09	-0.002617244	0.471
ASV_1856	Sva0081 sediment group	GH	-0.748282772	0.007	-0.024767627	0.47
ASV_1536	Luteolibacter	GH	-0.687767803	0.011	-0.053151581	0.469
ASV_2053	Exiguobacterium	GH	-0.411983484	0.073	-0.03850093	0.465
ASV_1606	Phreatobacter	GH	-0.478656767	0.061	-0.048401683	0.464
ASV_968	Sulfuritalea	GH	-0.730470413	0.004	-0.052255859	0.462
ASV_1997	NA	GH	-0.678052672	0.01	-0.110509965	0.459
ASV_2441	Thiobacillus	GH	-0.768817464	0.003	-0.05094754	0.455
ASV_5932	NA	GH	-0.615032792	0.017	-0.03058	0.455
ASV_618	Azospira	GH	-0.383303047	0.082	-0.056331729	0.455
ASV_4079	Desulfobacca	GH	-0.640128967	0.011	-0.073198697	0.454
ASV_372	Aquabacterium	GH	-0.627531939	0.008	-0.028756877	0.452
ASV_45	2013Ark19i	GH	-0.290634434	0.176	-0.075691009	0.449
ASV_717	Staphylococcus	GH	-0.43028863	0.07	-0.081534002	0.444
ASV_1405	Desulfomicrobium	GH	-0.493337094	0.045	-0.090865289	0.443
ASV_1720	Thauera	GH	-0.299638217	0.142	-0.076583032	0.443
ASV_73	Aeromonas	GH	-0.402883874	0.074	-0.057122464	0.442
ASV_1194	Finegoldia	GH	-0.450189803	0.065	-0.043379131	0.44
ASV_2751	NA	GH	-0.821045717	0.001	-0.082824982	0.44
ASV_1917	NA	GH	-0.576352283	0.017	-0.080679077	0.439
ASV_1224	Luteolibacter	GH	-0.697944744	0.006	-0.082326639	0.436
ASV_1368	Dechloromonas	GH	-0.481306802	0.047	-0.065773859	0.436
ASV_1158	NA	GH	-0.869969365	0	-0.06142069	0.43
ASV_2210	Propionivibrio	GH	-0.558081942	0.014	-0.075368498	0.427
ASV_4764	GCA-900066575	GH	-0.309194856	0.17	-0.099046881	0.422
ASV_1332	Lactobacillus	GH	-0.587986168	0.028	-0.109266356	0.421
ASV_3248	Peptoniphilus	GH	-0.321262771	0.147	-0.135912693	0.413
ASV_525	Dechloromonas	GH	-0.679841647	0.014	-0.047338172	0.411
ASV_8426	Pseudoglutamicibacter	GH	-0.304331157	0.17	-0.112385287	0.41
ASV_523	Pseudomonas	GH	-0.663128631	0.008	-0.054984701	0.407
ASV_57	Aeromonas	GH	-0.233145343	0.204	-0.038819577	0.406
ASV_2339	NA	GH	-0.347339487	0.107	-0.105711471	0.403
ASV_1174	NA	GH	-0.715785671	0.006	-0.140466907	0.399
ASV_97	Vibrio	GH	-0.511019437	0.037	-0.090422532	0.398
ASV_1908	Desulfomicrobium	GH	-0.418489662	0.062	-0.129174179	0.379
ASV_1239	NA	GH	-0.539062667	0.039	-0.149668897	0.378
ASV_500	Desulfatiglans	GH	-0.845181855	0.003	-0.105920317	0.377
ASV_952	Acinetobacter	GH	-0.713775365	0.006	-0.17139159	0.375
ASV_42	NA	GH	-0.44552352	0.072	-0.188983334	0.373
ASV_953	Pseudarcobacter	GH	-0.788975031	0.003	-0.122697496	0.371
ASV_1080	Desulfobulbus	GH	-0.376878074	0.108	-0.168127829	0.36
ASV_2324	BD1-7 clade	GH	-0.655649408	0.01	-0.155127526	0.358
ASV_445	Exiguobacterium	GH	-0.573092266	0.018	-0.140262012	0.358
ASV_231	Candidatus Arthromitus	GH	-0.360395428	0.11	-0.121582239	0.354
ASV_14	Paraclostridium	GH	-0.352229872	0.085	-0.131068607	0.35
ASV_113	Enterobacter	GH	-0.591112283	0.021	-0.170724051	0.349
ASV_548	Rheinheimera	GH	-0.734700628	0.004	-0.137316717	0.349
ASV_1610	NA	GH	-0.516535057	0.033	-0.187781506	0.345
ASV_1168	NA	GH	-0.458537339	0.06	-0.139523124	0.344
ASV_2052	Ellin6067	GH	-0.496295615	0.042	-0.209858078	0.343
ASV_3978	NA	GH	-0.284107596	0.182	-0.221497185	0.343
ASV_901	Desulfatiglans	GH	-0.580778432	0.023	-0.187394683	0.341
ASV_2227	NA	GH	-0.804779086	0.002	-0.175865445	0.34
ASV_1335	Candidatus Competibacter	GH	-0.772188523	0.001	-0.17297687	0.338
ASV_1272	Dongia	GH	-0.546451461	0.014	-0.130232965	0.337
ASV_730	Staphylococcus	GH	-0.08545951	0.361	-0.225710351	0.336
ASV_88	Terrisporobacter	GH	-0.445300628	0.067	-0.100422877	0.332
ASV_647	Paracoccus	GH	-0.720800551	0.003	-0.21233699	0.331
ASV_205	Epulopiscium	GH	-0.469867906	0.06	-0.148350355	0.33
ASV_337	Bacillus	GH	-0.690746922	0.01	-0.158103297	0.33
ASV_121	Arcobacter	GH	-0.405497765	0.084	-0.145947025	0.329
ASV_2431	Anoxybacillus	GH	-0.176195419	0.254	-0.212387497	0.329
ASV_3477	NA	GH	-0.355207489	0.114	-0.190178519	0.328
ASV_583	Rubribacterium	GH	-0.743980437	0.006	-0.219375516	0.327
ASV_65	Clostridium sensu stricto 1	GH	-0.587299962	0.013	-0.154215709	0.327
ASV_744	Sva0081 sediment group	GH	-0.62894485	0.018	-0.099391702	0.326
ASV_8659	NA	GH	-0.677107461	0.014	-0.266170886	0.325
ASV_2326	Desulfomicrobium	GH	-0.362011064	0.105	-0.206136238	0.323
ASV_1130	NA	GH	-0.676337281	0.01	-0.180389207	0.321
ASV_2281	Methylobacterium-Methylorubrum	GH	-0.720524613	0.008	-0.231482792	0.321
ASV_2990	Candidatus Competibacter	GH	-0.894857569	0.001	-0.24742962	0.321
ASV_660	Acinetobacter	GH	-0.854763078	0.002	-0.229841005	0.32
ASV_1968	Clostridium sensu stricto 1	GH	-0.56827523	0.036	-0.089742245	0.319
ASV_466	NA	GH	-0.45140091	0.069	-0.272766979	0.318
ASV_5138	Rhodobacter	GH	-0.602975709	0.028	-0.171751716	0.318
ASV_969	Sva0081 sediment group	GH	-0.660920177	0.009	-0.082117904	0.317
ASV_13	Romboutsia	GH	-0.520037222	0.021	-0.126432066	0.315
ASV_673	Roseomonas	GH	-0.583311815	0.024	-0.146279746	0.313
ASV_641	Exiguobacterium	GH	-0.696576626	0.002	-0.211852812	0.307
ASV_1407	Allorhizobium-Neorhizobium-Pararhizobium-Rhizobium	GH	-0.429752499	0.066	-0.252519263	0.305
ASV_4788	Hydrogenophaga	GH	-0.263758259	0.199	-0.229961247	0.305
ASV_872	Rivibacter	GH	-0.791899451	0.005	-0.094325406	0.301
ASV_1805	NA	GH	-0.69925703	0.005	-0.32183123	0.299
ASV_2670	NA	GH	-0.727244939	0.009	-0.212860283	0.298
ASV_415	Rubribacterium	GH	-0.658540865	0.015	-0.088036406	0.294
ASV_427	NA	GH	-0.343731265	0.126	-0.279545079	0.294
ASV_848	NA	GH	-0.5428339	0.031	-0.19189388	0.294
ASV_3243	NA	GH	-0.489997397	0.052	-0.204817119	0.291
ASV_8650	NA	GH	-0.696274887	0.011	-0.258078329	0.291
ASV_2047	NA	GH	-0.347856854	0.125	-0.270257087	0.289
ASV_256	Pseudochrobactrum	GH	-0.682581275	0.017	-0.305414353	0.287
ASV_311	Citrobacter	GH	-0.705510413	0.014	-0.291561687	0.287
ASV_1004	NA	GH	-0.518366948	0.029	-0.173288822	0.285
ASV_498	Dechloromonas	GH	-0.739068051	0.003	-0.236834303	0.283
ASV_620	Desulfoprunum	GH	-0.31860388	0.12	-0.201126527	0.283
ASV_1554	NA	GH	-0.48350745	0.041	-0.324658927	0.281
ASV_7	Vibrio	GH	-0.527447446	0.022	-0.129612266	0.281
ASV_28	Plesiomonas	GH	-0.583464927	0.018	-0.141167282	0.276
ASV_1012	Lautropia	GH	-0.795758471	0.004	-0.165602448	0.271
ASV_1561	Thermoanaerobaculum	GH	-0.662550842	0.015	-0.204878469	0.271
ASV_5063	NA	GH	-0.413486344	0.07	-0.228715859	0.271
ASV_806	Rivibacter	GH	-0.592460454	0.019	-0.293330577	0.271
ASV_4710	Prosthecobacter	GH	-0.696388216	0.015	-0.325663007	0.269
ASV_749	NA	GH	-0.684468724	0.014	-0.331916674	0.268
ASV_3	Cetobacterium	GH	-0.469858932	0.042	-0.120236898	0.267
ASV_1232	Allorhizobium-Neorhizobium-Pararhizobium-Rhizobium	GH	-0.683364156	0.01	-0.345496182	0.263
ASV_1392	Pseudomonas	GH	-0.488344291	0.038	-0.126635126	0.262
ASV_1523	NA	GH	-0.753061964	0	-0.290826686	0.262
ASV_2075	Luteolibacter	GH	-0.559593213	0.038	-0.304136731	0.262
ASV_69	Pseudomonas	GH	-0.587466986	0.016	-0.154108225	0.261
ASV_420	Sva0081 sediment group	GH	-0.779451433	0.004	-0.356310912	0.26
ASV_1987	Turicibacter	GH	-0.615512637	0.016	-0.286990729	0.259
ASV_46	Cetobacterium	GH	-0.425533576	0.088	-0.206209774	0.259
ASV_2043	NA	GH	-0.673774897	0.008	-0.327352372	0.258
ASV_2265	Desulfatirhabdium	GH	-0.408598373	0.062	-0.236169203	0.257
ASV_9	Aeromonas	GH	-0.381778178	0.08	-0.136897545	0.256
ASV_1216	NA	GH	-0.710123639	0.005	-0.258217319	0.255
ASV_4205	Tabrizicola	GH	-0.766498691	0.005	-0.296801834	0.253
ASV_12	Vibrio	GH	-0.394133611	0.096	-0.203660365	0.252
ASV_1775	966-1	GH	-0.724448797	0.014	-0.326949832	0.252
ASV_874	Arthronema SAG 12.89	GH	-0.686675778	0.015	-0.33724904	0.248
ASV_5074	Luteolibacter	GH	-0.754684209	0.007	-0.35279441	0.246
ASV_1230	Luteolibacter	GH	-0.711365635	0.003	-0.35117013	0.245
ASV_600	Rhodobacter	GH	-0.732011001	0.005	-0.283801405	0.245
ASV_2076	NA	GH	-0.685112181	0.012	-0.33561005	0.244
ASV_1286	Candidatus Accumulibacter	GH	-0.847899314	0	-0.257285729	0.243
ASV_194	Alkanindiges	GH	-0.621267038	0.018	-0.221173053	0.241
ASV_917	Paraclostridium	GH	-0.534305544	0.033	-0.324227293	0.241
ASV_938	NA	GH	-0.844342452	0.003	-0.330171615	0.241
ASV_1183	966-1	GH	-0.891580446	0.001	-0.223429325	0.24
ASV_17	Cetobacterium	GH	-0.538587979	0.026	-0.179973847	0.24
ASV_4347	Roseomonas	GH	-0.731799763	0.006	-0.380388799	0.24
ASV_2846	Alterococcus	GH	-0.357033259	0.117	-0.372648945	0.236
ASV_495	Desulfobulbus	GH	-0.780805525	0	-0.146527618	0.233
ASV_899	Rubribacterium	GH	-0.576102235	0.019	-0.311451443	0.232
ASV_340	Aquabacterium	GH	-0.458846094	0.043	-0.249833163	0.231
ASV_665	MND1	GH	-0.680495369	0.015	-0.374328956	0.23
ASV_555	NA	GH	-0.590819371	0.016	-0.337054395	0.226
ASV_661	Luteolibacter	GH	-0.634025114	0.012	-0.284317817	0.226
ASV_70	Romboutsia	GH	-0.746558947	0.007	-0.224035917	0.225
ASV_66	Romboutsia	GH	-0.534072009	0.026	-0.245119853	0.224
ASV_5334	Rickettsiella	GH	-0.689685203	0.012	-0.398999841	0.223
ASV_1365	Acetoanaerobium	GH	-0.412560372	0.068	-0.320185693	0.221
ASV_291	Clostridium sensu stricto 1	GH	-0.617665543	0.008	-0.22508797	0.221
ASV_877	NA	GH	-0.456738973	0.047	-0.253830884	0.22
ASV_453	Epulopiscium	GH	-0.548745587	0.034	-0.344630603	0.215
ASV_155	Bacillus	GH	-0.591401741	0.017	-0.31476943	0.214
ASV_2026	NA	GH	-0.370853089	0.093	-0.287443967	0.214
ASV_206	Tropicimonas	GH	-0.967045916	0	-0.157183407	0.21
ASV_312	Ellin6067	GH	-0.884546826	0	-0.20116656	0.21
ASV_170	NA	GH	-0.538077317	0.018	-0.256072587	0.208
ASV_343	Escherichia-Shigella	GH	-0.444772191	0.061	-0.346238603	0.208
ASV_554	Rubellimicrobium	GH	-0.856538099	0	-0.316263652	0.205
ASV_2317	Sulfurovum	GH	-0.525109077	0.034	-0.380504546	0.202
ASV_288	NA	GH	-0.903184339	0.001	-0.203721547	0.201
ASV_1057	Thauera	GH	-0.635807889	0.019	-0.33089011	0.199
ASV_6262	NA	GH	-0.75671007	0.006	-0.477004436	0.193
ASV_1068	Thiocapsa	GH	-0.628893033	0.016	-0.392540781	0.192
ASV_1367	Flavobacterium	GH	-0.669694385	0.015	-0.321781758	0.192
ASV_3662	Synechocystis PCC-6803	GH	-0.663385023	0.013	-0.444490213	0.191
ASV_4115	NA	GH	-0.414860897	0.072	-0.418266166	0.19
ASV_246	Clostridium sensu stricto 1	GH	-0.723859268	0.006	-0.428400563	0.188
ASV_1445	Dechlorosoma	GH	-0.559565089	0.025	-0.360431693	0.187
ASV_2834	IMCC26207	GH	-0.828595719	0.003	-0.492054534	0.187
ASV_736	Leptothrix	GH	-0.46657499	0.044	-0.371738233	0.185
ASV_2	Aeromonas	GH	-0.380242512	0.107	-0.160878339	0.184
ASV_220	Bacillus	GH	-0.622517275	0.012	-0.344417852	0.184
ASV_255	Clostridium sensu stricto 1	GH	-0.733447061	0.005	-0.267585348	0.182
ASV_998	Pseudomonas	GH	-0.522698809	0.046	-0.417196615	0.18
ASV_810	Dinghuibacter	GH	-0.309965642	0.132	-0.369408816	0.179
ASV_227	Chitinibacter	GH	-0.550730884	0.019	-0.307055713	0.178
ASV_5824	Cyanobium PCC-6307	GH	-0.603461099	0.008	-0.50982032	0.175
ASV_829	NA	GH	-0.742216474	0.001	-0.380352869	0.172
ASV_1002	Clostridium sensu stricto 1	GH	-0.76951393	0.007	-0.324931565	0.17
ASV_1090	Thermomonas	GH	-0.468766834	0.049	-0.291372143	0.169
ASV_68	Shewanella	GH	-0.273701412	0.148	-0.267692603	0.169
ASV_2280	Limnohabitans	GH	-0.321914052	0.135	-0.345110535	0.167
ASV_404	Cetobacterium	GH	-0.360567427	0.099	-0.245556141	0.167
ASV_504	NA	GH	-0.712560911	0.009	-0.247550758	0.167
ASV_40	Chitinivorax	GH	-0.761737668	0.001	-0.249136208	0.165
ASV_5476	NA	GH	-0.554161639	0.026	-0.504085249	0.165
ASV_1418	Thauera	GH	-0.60597885	0.019	-0.447317882	0.163
ASV_1573	NA	GH	-0.625066673	0.012	-0.539219766	0.163
ASV_735	NA	GH	-0.671383634	0.009	-0.50623165	0.161
ASV_117	Tabrizicola	GH	-0.665553763	0.014	-0.435787439	0.156
ASV_513	NA	GH	-0.651646924	0.006	-0.329483297	0.154
ASV_386	Rheinheimera	GH	-0.455740386	0.043	-0.430148462	0.153
ASV_1369	Pseudomonas	GH	-0.527775035	0.033	-0.549363115	0.149
ASV_2557	NA	GH	-0.669660469	0.015	-0.394877249	0.149
ASV_534	NA	GH	-0.701798204	0.009	-0.294440086	0.149
ASV_956	Rhodobacter	GH	-0.587216449	0.012	-0.441551055	0.149
ASV_112	ZOR0006	GH	-0.523987843	0.025	-0.358280558	0.147
ASV_5	Vibrio	GH	-0.236138688	0.186	-0.228671239	0.146
ASV_916	Azospira	GH	-0.385241345	0.101	-0.39445947	0.146
ASV_1654	NA	GH	-0.559048982	0.021	-0.450629018	0.145
ASV_48	Aeromonas	GH	-0.37309727	0.088	-0.284753065	0.145
ASV_837	Terrimicrobium	GH	-0.6827642	0.013	-0.351249412	0.144
ASV_1760	NA	GH	-0.470743136	0.038	-0.583192331	0.143
ASV_2551	Macellibacteroides	GH	-0.655585537	0.016	-0.560437996	0.14
ASV_635	Sva0081 sediment group	GH	-0.813481708	0.002	-0.3188227	0.139
ASV_91	Clostridium sensu stricto 1	GH	-0.745911554	0.002	-0.389095598	0.138
ASV_271	Clostridium sensu stricto 1	GH	-0.545321002	0.025	-0.437819093	0.135
ASV_1896	Hyphomicrobium	GH	-0.68262626	0.008	-0.523654972	0.134
ASV_59	Pseudomonas	GH	-0.534379267	0.024	-0.283362701	0.133
ASV_904	Hyphomicrobium	GH	-0.792598164	0	-0.304226425	0.126
ASV_915	Desulfoprunum	GH	-0.414604029	0.065	-0.312005903	0.126
ASV_1773	NA	GH	-0.722310105	0.008	-0.472177331	0.125
ASV_695	Faecalibacterium	GH	-0.773534193	0.004	-0.607603514	0.119
ASV_865	Ellin6067	GH	-0.44554594	0.056	-0.214866277	0.119
ASV_646	Rhizobacter	GH	-0.628048795	0.014	-0.513954469	0.118
ASV_813	Sulfurifustis	GH	-0.516128341	0.028	-0.370188039	0.118
ASV_2104	Luteolibacter	GH	-0.33457137	0.143	-0.595650654	0.116
ASV_666	Cyanobium PCC-6307	GH	-0.637711665	0.025	-0.333332691	0.116
ASV_1868	Leptothrix	GH	-0.517848994	0.032	-0.510537354	0.115
ASV_1900	Sphingomonas	GH	-0.544742331	0.025	-0.623399791	0.115
ASV_576	NA	GH	-0.571331511	0.018	-0.404041624	0.113
ASV_1755	DEV008	GH	-0.660659065	0.007	-0.364269076	0.112
ASV_568	Clostridium sensu stricto 1	GH	-0.569763733	0.029	-0.550978195	0.11
ASV_574	NA	GH	-0.814701388	0.002	-0.345594162	0.11
ASV_856	Micrococcus	GH	-0.167065601	0.291	-0.508389676	0.11
ASV_961	Phreatobacter	GH	-0.48092892	0.06	-0.647491788	0.108
ASV_1029	NA	GH	-0.651490967	0.012	-0.385774192	0.107
ASV_1990	NA	GH	-0.513919282	0.02	-0.414787519	0.107
ASV_626	Desulfovirga	GH	-0.877337969	0.002	-0.242197364	0.105
ASV_221	NA	GH	-0.939787634	0	-0.319290731	0.104
ASV_992	BD1-7 clade	GH	-0.69006566	0.003	-0.392130911	0.102
ASV_41	Aeromonas	GH	-0.304112953	0.124	-0.250562848	0.094
ASV_484	Candidatus Megaira	GH	-0.423385711	0.059	-0.503062313	0.093
ASV_887	Roseomonas	GH	-0.479339615	0.045	-0.588651951	0.093
ASV_527	Chitinibacter	GH	-0.576244813	0.025	-0.444229403	0.089
ASV_1348	Mariniradius	GH	-0.867914296	0.002	-0.440428349	0.086
ASV_3150	Bosea	GH	-0.509929864	0.043	-0.660521998	0.086
ASV_598	Luteolibacter	GH	-0.555892452	0.04	-0.672561966	0.086
ASV_317	Epulopiscium	GH	-0.445050015	0.045	-0.576701556	0.084
ASV_3877	Longivirga	GH	-0.703013188	0.008	-0.687825201	0.084
ASV_2269	Rhodobacter	GH	-0.772969114	0.002	-0.571672777	0.083
ASV_2535	NA	GH	-0.590097256	0.011	-0.563224727	0.082
ASV_125	NA	GH	-0.801732197	0.006	-0.251753899	0.081
ASV_423	Clostridium sensu stricto 1	GH	-0.544343693	0.025	-0.364669422	0.08
ASV_11	Aeromonas	GH	-0.299642427	0.144	-0.224542573	0.078
ASV_684	NA	GH	-0.692408182	0.005	-0.525225664	0.078
ASV_118	Trichodesmium IMS101	GH	-0.825489408	0.002	-0.670098447	0.077
ASV_434	NA	GH	-0.752818333	0.003	-0.454223212	0.077
ASV_1948	NA	GH	-0.555230975	0.026	-0.703267141	0.076
ASV_413	NA	GH	-0.952241714	0	-0.452853994	0.076
ASV_694	Snowella 0TU37S04	GH	-0.586649439	0.013	-0.461499294	0.076
ASV_18	Oscillatoria PCC-10802	GH	-0.361514695	0.099	-0.401117685	0.075
ASV_325	NA	GH	-0.55128041	0.04	-0.679772205	0.075
ASV_692	Clostridium sensu stricto 5	GH	-0.511288947	0.041	-0.590688471	0.075
ASV_1247	NA	GH	-0.449709767	0.053	-0.49519692	0.074
ASV_1433	Desulfobacca	GH	-0.725004636	0.01	-0.521823165	0.073
ASV_571	NA	GH	-0.578807198	0.016	-0.31746415	0.073
ASV_135	NA	GH	-0.747747235	0.004	-0.368134176	0.071
ASV_380	Thiobacillus	GH	-0.820939857	0.005	-0.431515385	0.071
ASV_1131	NA	GH	-0.834402865	0.001	-0.299180894	0.07
ASV_1222	NA	GH	-0.350406044	0.099	-0.499513576	0.07
ASV_2180	NA	GH	-0.512059275	0.041	-0.510154613	0.07
ASV_330	Clostridium sensu stricto 9	GH	-0.441671946	0.065	-0.990307341	0.069
ASV_1038	NA	GH	-0.854013334	0	-0.683336312	0.068
ASV_2456	Pseudorhodobacter	GH	-0.900450961	0.001	-0.715924606	0.068
ASV_81	Pseudomonas	GH	-0.510431782	0.038	-0.426882302	0.066
ASV_252	Epulopiscium	GH	-0.542304318	0.02	-0.581775184	0.065
ASV_357	NA	GH	-0.746483144	0.003	-0.417542579	0.064
ASV_1741	Luteolibacter	GH	-0.637899686	0.018	-0.740642432	0.063
ASV_557	NA	GH	-0.713437967	0.014	-0.512774756	0.063
ASV_973	Seohaeicola	GH	-0.437355619	0.07	-0.653407156	0.063
ASV_888	Tabrizicola	GH	-0.653683031	0.009	-0.655821747	0.062
ASV_129	Epulopiscium	GH	-0.423475779	0.073	-0.555813604	0.061
ASV_1566	NA	GH	-0.631618667	0.016	-0.484495146	0.061
ASV_1750	Clostridium sensu stricto 1	GH	-0.38355914	0.112	-0.452733868	0.061
ASV_1506	Azospira	GH	-0.467351823	0.05	-0.462582529	0.059
ASV_1592	NA	GH	-0.870339273	0.001	-0.664221875	0.059
ASV_2414	Sulfurimonas	GH	-0.384268477	0.102	-0.557371359	0.059
ASV_354	NA	GH	-0.525695212	0.041	-0.642136034	0.059
ASV_94	Rheinheimera	GH	-0.493750567	0.056	-0.399771599	0.059
ASV_151	Epulopiscium	GH	-0.520114361	0.029	-0.558466729	0.057
ASV_1352	Paracoccus	GH	-0.614464079	0.019	-0.37970582	0.056
ASV_1608	NA	GH	-0.595959155	0.021	-0.486275485	0.055
ASV_402	NA	GH	-0.4374749	0.065	-0.350842505	0.055
ASV_1403	Subgroup 23	GH	-0.586410306	0.021	-0.403186681	0.054
ASV_373	Cyanobium PCC-6307	GH	-0.414284676	0.073	-0.769243969	0.054
ASV_4492	Tabrizicola	GH	-0.658868562	0.007	-0.459013517	0.054
ASV_669	Dechloromonas	GH	-0.705008772	0.001	-0.393258091	0.054
ASV_371	Aquabacterium	GH	-0.401709663	0.076	-0.443757026	0.053
ASV_1321	Allorhizobium-Neorhizobium-Pararhizobium-Rhizobium	GH	-0.511180142	0.051	-0.738213605	0.052
ASV_1277	Algoriphagus	GH	-0.467891476	0.04	-0.673221761	0.051
ASV_189	NA	GH	-0.640032337	0.009	-0.346537647	0.051
ASV_2648	Desulfatitalea	GH	-0.730762592	0.004	-0.761061188	0.05
ASV_847	Luteolibacter	GH	-0.633297934	0.008	-0.582782651	0.05
ASV_1159	Methylocystis	GH	-0.706405087	0	-0.526904802	0.049
ASV_1725	Anaerosinus	GH	-0.531296714	0.048	-0.699570994	0.049
ASV_1399	NA	GH	-0.756549696	0.002	-0.612557456	0.048
ASV_1962	NA	GH	-0.571283518	0.026	-0.728372735	0.048
ASV_1237	NA	GH	-0.653693998	0.01	-0.608261333	0.047
ASV_1465	NA	GH	-0.564710584	0.03	-0.325282144	0.047
ASV_1579	NA	GH	-0.513255966	0.046	-0.697671491	0.047
ASV_2900	Hyphomicrobium	GH	-0.545155118	0.023	-0.751224258	0.047
ASV_384	NA	GH	-0.507582448	0.059	-0.715974994	0.047
ASV_100	Aeromonas	GH	-0.311012792	0.147	-0.530788174	0.046
ASV_538	NA	GH	-0.518381473	0.032	-0.553169156	0.044
ASV_1087	Cyanobium PCC-6307	GH	-0.606535616	0.01	-0.761166103	0.043
ASV_219	C39	GH	-0.378307214	0.075	-0.56277273	0.043
ASV_518	Desulfatiglans	GH	-0.634780741	0.015	-0.39284273	0.043
ASV_828	Methanolinea	GH	-0.918732444	0.001	-0.391361922	0.043
ASV_1698	Romboutsia	GH	-0.472254467	0.047	-0.617358393	0.041
ASV_297	Clostridium sensu stricto 1	GH	-0.463930458	0.052	-0.695233531	0.041
ASV_328	Luteolibacter	GH	-0.608560871	0.026	-0.418930019	0.04
ASV_1022	Pseudomonas	GH	-0.556325492	0.029	-0.615429061	0.039
ASV_162	Shewanella	GH	-0.324161399	0.123	-0.522533323	0.039
ASV_23	Oscillatoria PCC-10802	GH	-0.33495307	0.133	-0.444127386	0.039
ASV_438	Thiobacillus	GH	-0.655097956	0.017	-0.489547805	0.038
ASV_1028	Ahniella	GH	-0.449540304	0.057	-0.716244081	0.037
ASV_15	Oscillatoria PCC-10802	GH	-0.405684173	0.074	-0.497332773	0.037
ASV_2246	Bacteroides	GH	-0.388313156	0.093	-0.805292116	0.037
ASV_2793	NA	GH	-0.579533476	0.027	-0.950282605	0.037
ASV_2835	NA	GH	-0.739576994	0.007	-0.587518167	0.037
ASV_656	Rubellimicrobium	GH	-0.646132291	0.009	-0.73389988	0.037
ASV_1662	NA	GH	-0.646996326	0.011	-0.34194489	0.036
ASV_657	Tabrizicola	GH	-0.624345532	0.02	-0.371033685	0.036
ASV_809	Dinghuibacter	GH	-0.54807226	0.016	-0.48725194	0.035
ASV_1546	Paludibacter	GH	-0.400789297	0.067	-0.641583024	0.034
ASV_478	Halioglobus	GH	-0.813108137	0.002	-0.478629953	0.034
ASV_171	Clostridium sensu stricto 1	GH	-0.448591207	0.072	-0.707700032	0.033
ASV_441	Luteolibacter	GH	-0.540063893	0.034	-0.817635556	0.033
ASV_1065	Methanoregula	GH	-0.850297646	0.002	-0.362957744	0.032
ASV_1169	Ideonella	GH	-0.534523011	0.021	-0.442863897	0.031
ASV_39	Oscillatoria PCC-10802	GH	-0.358052827	0.107	-0.565322436	0.031
ASV_1364	NA	GH	-0.605330336	0.015	-0.889544702	0.03
ASV_30	Oscillatoria PCC-10802	GH	-0.35789568	0.105	-0.474030975	0.03
ASV_431	Luteolibacter	GH	-0.721122688	0.006	-0.419989074	0.03
ASV_933	Haloferula	GH	-0.548191482	0.027	-0.822689051	0.029
ASV_1133	Ilumatobacter	GH	-0.616542646	0.021	-0.973245853	0.028
ASV_285	NA	GH	-0.861251836	0.002	-0.529501295	0.028
ASV_1483	Algoriphagus	GH	-0.488300262	0.032	-0.467935234	0.027
ASV_419	Thiobacillus	GH	-0.653052377	0.016	-0.590608371	0.027
ASV_512	Candidatus Competibacter	GH	-0.638981938	0.012	-0.525439775	0.026
ASV_532	Sva0081 sediment group	GH	-0.526576043	0.037	-0.282660826	0.026
ASV_282	Pseudomonas	GH	-0.368619276	0.086	-0.920136988	0.025
ASV_1943	Candidatus Competibacter	GH	-0.60978582	0.013	-0.853552173	0.023
ASV_2305	Dechloromonas	GH	-0.628979297	0.02	-0.983291094	0.023
ASV_448	Desulfatiglans	GH	-0.813615504	0.001	-0.441624565	0.023
ASV_167	Tabrizicola	GH	-0.534420339	0.019	-0.63156907	0.022
ASV_2019	NA	GH	-0.547520534	0.024	-0.848024908	0.022
ASV_267	NA	GH	-0.726321547	0.005	-0.477275368	0.022
ASV_632	Leptothrix	GH	-0.640626678	0.01	-0.662054425	0.022
ASV_846	NA	GH	-0.697310862	0.009	-0.704043476	0.022
ASV_233	Clostridium sensu stricto 1	GH	-0.51722036	0.037	-0.951696133	0.021
ASV_364	Rivibacter	GH	-0.664114636	0.008	-0.376204509	0.021
ASV_556	CI75cm.2.12	GH	-0.48455555	0.058	-0.531408286	0.021
ASV_833	NA	GH	-0.826363804	0.004	-0.626111134	0.021
ASV_133	Bacillus	GH	-0.544844374	0.034	-1.184105036	0.02
ASV_1940	Cyanobium PCC-6307	GH	-0.647588905	0.009	-0.855163241	0.02
ASV_241	Sva0081 sediment group	GH	-0.524291151	0.023	-0.415276633	0.02
ASV_257	Rubribacterium	GH	-0.68963767	0.007	-0.63841836	0.02
ASV_356	Candidatus Competibacter	GH	-0.699786618	0.009	-0.55844686	0.02
ASV_5276	NA	GH	-0.721269219	0.011	-0.989399697	0.02
ASV_563	NA	GH	-0.756696392	0.008	-0.683744675	0.02
ASV_1439	NA	GH	-0.831069113	0.001	-0.70697044	0.019
ASV_449	Romboutsia	GH	-0.563055556	0.036	-1.046160999	0.019
ASV_454	Hyphomicrobium	GH	-0.405248447	0.069	-0.854046618	0.019
ASV_82	Paraclostridium	GH	-0.292081954	0.163	-0.657028048	0.019
ASV_1129	NA	GH	-0.686114268	0.006	-0.420797173	0.018
ASV_2742	Luteolibacter	GH	-0.542741777	0.033	-1.138479183	0.018
ASV_314	Aquabacterium	GH	-0.599729272	0.025	-0.338860362	0.018
ASV_193	NA	GH	-0.790005467	0.004	-0.600930589	0.017
ASV_2009	Roseomonas	GH	-0.435264571	0.073	-0.975299743	0.017
ASV_212	Dechloromonas	GH	-0.662689412	0.012	-0.572218397	0.016
ASV_258	NA	GH	-0.570063656	0.024	-0.380609397	0.016
ASV_27	Limnothrix	GH	-0.545929632	0.032	-0.865642403	0.016
ASV_719	Desulfobulbus	GH	-0.573652597	0.032	-0.784557494	0.016
ASV_743	NA	GH	-0.708290704	0.008	-0.520897438	0.016
ASV_777	Luteolibacter	GH	-0.600864182	0.022	-0.904026369	0.016
ASV_108	Pseudomonas	GH	-0.41398045	0.056	-0.463935377	0.015
ASV_1398	NA	GH	-0.594859222	0.016	-0.595451561	0.015
ASV_1794	Flavobacterium	GH	-0.497589474	0.06	-0.881418433	0.015
ASV_199	Paracoccus	GH	-0.753143586	0.001	-0.711994177	0.015
ASV_2495	Deefgea	GH	-0.629881886	0.018	-0.974979819	0.015
ASV_410	Tabrizicola	GH	-0.671106648	0.009	-0.566883707	0.015
ASV_726	NA	GH	-0.504162893	0.028	-0.594295673	0.015
ASV_757	Clostridium sensu stricto 1	GH	-0.489458362	0.06	-0.883520603	0.015
ASV_411	NA	GH	-0.879166199	0.001	-0.50632364	0.014
ASV_1509	Chitinibacter	GH	-0.479271625	0.052	-1.221487967	0.013
ASV_1572	Tropicimonas	GH	-0.810227962	0.001	-0.756677689	0.013
ASV_586	Denitratisoma	GH	-0.531171169	0.04	-0.949493435	0.013
ASV_1363	Woeseia	GH	-0.278989012	0.19	-0.836512373	0.012
ASV_930	Synechocystis SAG 90.79	GH	-0.69397431	0.012	-0.668183752	0.012
ASV_238	Pseudomonas	GH	-0.578176122	0.034	-0.448558132	0.011
ASV_696	Sandaracinobacter	GH	-0.484505272	0.036	-0.652707923	0.011
ASV_8	Cetobacterium	GH	-0.019396096	0.465	-0.349058872	0.011
ASV_1791	TM7a	GH	-0.496831789	0.053	-0.906411537	0.01
ASV_1998	Planktothrix NIVA-CYA 15	GH	-0.410636667	0.091	-1.307912892	0.01
ASV_382	Thauera	GH	-0.476929339	0.06	-0.774163839	0.01
ASV_55	Clostridium sensu stricto 1	GH	-0.489671173	0.059	-0.983167379	0.01
ASV_1086	TM7a	GH	-0.477400431	0.062	-0.894356919	0.009
ASV_2388	Aurantisolimonas	GH	-0.421154825	0.07	-0.916144198	0.009
ASV_25	Vibrio	GH	-0.458361975	0.057	-1.014697472	0.009
ASV_324	Ilumatobacter	GH	-0.370293415	0.079	-0.595924376	0.009
ASV_43	Vibrio	GH	-0.442308019	0.073	-0.590591337	0.009
ASV_447	Dechloromonas	GH	-0.219205443	0.218	-0.650592868	0.009
ASV_482	NA	GH	-0.493371282	0.05	-0.904514746	0.009
ASV_569	Actibacter	GH	-0.870002676	0.001	-0.706371887	0.009
ASV_608	Pelomonas	GH	-0.551916383	0.034	-0.680394328	0.009
ASV_873	NA	GH	-0.495810733	0.066	-1.216855337	0.009
ASV_132	Roseofilum AO1-A	GH	-0.457568458	0.06	-1.429892744	0.008
ASV_1691	Epulopiscium	GH	-0.482472504	0.052	-0.989646933	0.008
ASV_1855	NA	GH	-0.504371855	0.042	-1.234831448	0.008
ASV_224	Vibrio	GH	-0.497580132	0.058	-1.119475708	0.008
ASV_991	Tabrizicola	GH	-0.607468411	0.015	-0.956946559	0.008
ASV_1047	NA	GH	-0.489594222	0.068	-0.991993252	0.007
ASV_1217	Limnobacter	GH	-0.57187387	0.032	-0.455979203	0.007
ASV_1742	alphaI cluster	GH	-0.657454815	0.01	-0.858783617	0.007
ASV_240	NA	GH	-0.510341023	0.047	-1.097825029	0.007
ASV_2540	Planktothrix NIVA-CYA 15	GH	-0.669866278	0.017	-1.422995594	0.007
ASV_259	Cyanobium PCC-6307	GH	-0.511157845	0.031	-0.704689945	0.007
ASV_3019	Mycobacterium	GH	-0.759448022	0.005	-1.13362159	0.007
ASV_32	Oscillatoria PCC-10802	GH	-0.354502297	0.107	-0.758974557	0.007
ASV_971	Shewanella	GH	-0.502673269	0.053	-0.976189659	0.007
ASV_1933	Tabrizicola	GH	-0.655618761	0.012	-1.206918817	0.006
ASV_2411	NA	GH	-0.459105849	0.057	-0.887258611	0.006
ASV_370	NA	GH	-0.551358873	0.037	-0.751480484	0.006
ASV_605	Epulopiscium	GH	-0.491923718	0.057	-0.979489664	0.006
ASV_680	Terrimicrobium	GH	-0.507359967	0.05	-1.250224967	0.006
ASV_105	Enterovibrio	GH	-0.50472894	0.056	-1.122626289	0.005
ASV_1926	NA	GH	-0.344186303	0.106	-0.75694315	0.005
ASV_2390	Vibrio	GH	-0.489289586	0.061	-1.24563816	0.005
ASV_3058	NA	GH	-0.683156539	0.013	-0.967952269	0.005
ASV_308	Dechloromonas	GH	-0.643586827	0.018	-1.083170065	0.005
ASV_428	Ignavibacterium	GH	-0.815245843	0.002	-0.805831471	0.005
ASV_638	NA	GH	-0.738132927	0.006	-0.580459381	0.005
ASV_1125	NA	GH	-0.541342472	0.028	-1.188442256	0.004
ASV_244	NA	GH	-0.598763712	0.018	-0.697926929	0.004
ASV_2717	Luteolibacter	GH	-0.558126196	0.037	-1.06183424	0.004
ASV_351	Allorhizobium-Neorhizobium-Pararhizobium-Rhizobium	GH	-0.483223354	0.043	-0.66215964	0.004
ASV_4734	NA	GH	-0.630120581	0.021	-1.363823761	0.004
ASV_1633	Propionivibrio	GH	-0.575328037	0.021	-0.45455569	0.003
ASV_2542	Luteolibacter	GH	-0.627615018	0.018	-1.190355927	0.003
ASV_629	Dechloromonas	GH	-0.853843057	0.002	-0.625366346	0.003
ASV_934	Rhodobacter	GH	-0.625496784	0.016	-1.10942291	0.003
ASV_217	Bacillus	GH	-0.444508401	0.066	-0.815823193	0.002
ASV_3963	NA	GH	-0.559181352	0.03	-1.315019895	0.002
ASV_443	NA	GH	-0.718127595	0.01	-0.740977826	0.002
ASV_560	Thiocapsa	GH	-0.304539205	0.143	-0.898474335	0.002
ASV_612	Methylocystis	GH	-0.556434026	0.031	-0.704433702	0.002
ASV_630	Rivibacter	GH	-0.712094923	0.009	-0.565424727	0.002
ASV_1154	NA	GH	-0.789031218	0.004	-0.66678202	0.001
ASV_181	NA	GH	-0.597221668	0.033	-0.827556797	0.001
ASV_1867	Flavobacterium	GH	-0.55686581	0.025	-1.12357678	0.001
ASV_3683	SH3-11	GH	-0.655316605	0.011	-1.205096872	0.001
ASV_624	Bacillus	GH	-0.56019494	0.03	-1.464014048	0.001
ASV_662	Terrimicrobium	GH	-0.639859795	0.025	-0.745602979	0.001
ASV_801	Desulfococcus	GH	-0.563943545	0.04	-0.728111499	0.001
ASV_1009	Luteolibacter	GH	-0.620227051	0.014	-1.059575805	0
ASV_1082	NA	GH	-0.675113189	0.018	-1.64502301	0
ASV_319	NA	GH	-0.745850092	0.004	-0.661787354	0
ASV_479	Thiobacillus	GH	-0.595861665	0.033	-0.826306043	0
ASV_566	Mariniradius	GH	-0.6080926	0.031	-0.78325758	0
ASV_89	NA	GH	-0.405996552	0.078	-0.690245298	0
ASV_1040	Luteolibacter	GH	-390985 days, 20:59:01	00:27:00	-234934 days, 12:45:00	0
ASV_1226	Ignavibacterium	GH	-401570 days, 5:04:01	00:19:00	-628280 days, 17:58:01	0
ASV_1412	Candidatus Microthrix	GH	-428348 days, 20:29:00	00:19:00	-199595 days, 13:39:00	0
ASV_186	Aurantisolimonas	GH	-300000 days, 5:48:00	01:16:00	-453971 days, 11:54:00	0
ASV_393	Gemmobacter	GH	-397421 days, 2:51:00	00:13:00	-72144 days, 4:26:00	0
ASV_481	OLB12	GH	-486943 days, 9:05:00	00:09:00	-607065 days, 1:16:00	0
ASV_652	Candidatus Competibacter	GH	-482671 days, 21:54:01	00:12:00	-22821 days, 11:49:00	0
ASV_1	Mycoplasma	VH	-0.248477656	0.212	0.615944631	1
ASV_4	NA	VH	-0.247399081	0.206	0.584529125	0.999
ASV_106	NA	VH	-0.575554039	0.023	1.588089335	0.989
ASV_783	Clostridium sensu stricto 2	VH	-0.741435267	0.009	1.089781651	0.981
ASV_31	Mycoplasma	VH	-0.440797469	0.079	1.106269302	0.963
ASV_1750	Clostridium sensu stricto 1	VH	-0.711295806	0.013	1.043457796	0.962
ASV_605	Epulopiscium	VH	-0.702908646	0.018	0.995896799	0.947
ASV_246	Clostridium sensu stricto 1	VH	-0.682178602	0.005	0.323008406	0.784
ASV_112	ZOR0006	VH	-0.773715807	0.006	0.399124967	0.751
ASV_42	NA	VH	-0.810527051	0.003	0.358401878	0.715
ASV_1332	Lactobacillus	VH	-0.733994848	0.006	0.181589871	0.634
ASV_113	Enterobacter	VH	-0.674070047	0.016	0.074057919	0.629
ASV_46	Cetobacterium	VH	-0.933267678	0	-0.031033747	0.517
ASV_291	Clostridium sensu stricto 1	VH	-0.75699294	0.002	0.024151418	0.514
ASV_411	NA	VH	-0.933323328	0.001	-0.083115542	0.471
ASV_217	Bacillus	VH	-1.019574674	0	-0.246280209	0.372
ASV_333	NA	VH	-0.75329909	0.009	-0.280480878	0.359
ASV_5	Vibrio	VH	-0.836605279	0	-0.143796293	0.331
ASV_162	Shewanella	VH	-1.018913679	0	-0.274080144	0.315
ASV_66	Romboutsia	VH	-0.892983982	0.002	-0.265522966	0.301
ASV_917	Paraclostridium	VH	-0.941777239	0.002	-0.338082942	0.295
ASV_1087	Cyanobium PCC-6307	VH	-0.918238704	0.002	-0.438709872	0.285
ASV_796	Bacillus	VH	-0.96620123	0.002	-0.45881464	0.285
ASV_173	Cetobacterium	VH	-0.588136812	0.031	-0.397164241	0.277
ASV_367	Epulopiscium	VH	-0.865514884	0.002	-0.420109884	0.243
ASV_797	Terrisporobacter	VH	-0.942460419	0.001	-0.498257964	0.237
ASV_581	Turicibacter	VH	-0.972902525	0	-0.504207832	0.234
ASV_493	Terrisporobacter	VH	-0.930974213	0.004	-0.542708245	0.226
ASV_2225	Roseomonas	VH	-0.895730435	0.002	-0.534100922	0.22
ASV_2828	NA	VH	-0.900975242	0.004	-0.531202571	0.219
ASV_2635	NA	VH	-0.955948087	0	-0.55553165	0.218
ASV_129	Epulopiscium	VH	-0.757040134	0.005	-0.38023454	0.208
ASV_82	Paraclostridium	VH	-0.907008054	0.001	-0.62292814	0.199
ASV_747	NA	VH	-0.921081983	0	-0.640403504	0.194
ASV_2055	Nodosilinea PCC-7104	VH	-0.942617052	0.002	-0.523221518	0.189
ASV_57	Aeromonas	VH	-0.807677957	0.001	-0.481592805	0.189
ASV_1599	Cyanobium PCC-6307	VH	-0.916452989	0.001	-0.658406458	0.186
ASV_65	Clostridium sensu stricto 1	VH	-0.826747592	0.001	-0.54451211	0.183
ASV_1895	Clostridium sensu stricto 1	VH	-0.920061654	0.005	-0.714255628	0.181
ASV_330	Clostridium sensu stricto 9	VH	-0.948336393	0.001	-0.451161517	0.18
ASV_722	Cyanobium PCC-6307	VH	-0.981203986	0	-0.557377055	0.179
ASV_28	Plesiomonas	VH	-0.778539997	0.002	-0.447832914	0.167
ASV_84	Aeromonas	VH	-0.894333781	0.002	-0.694999082	0.162
ASV_288	NA	VH	-0.982443098	0	-0.645197687	0.159
ASV_1492	Phreatobacter	VH	-0.906466045	0.004	-0.727326155	0.158
ASV_564	Epulopiscium	VH	-0.765700308	0.006	-0.597677862	0.158
ASV_19	Paraclostridium	VH	-0.674373786	0.007	-0.689014279	0.152
ASV_289	NA	VH	-0.884051285	0.002	-0.753621746	0.152
ASV_41	Aeromonas	VH	-0.649481649	0.013	-0.51543839	0.152
ASV_1524	LD29	VH	-0.915838548	0	-0.680426549	0.15
ASV_322	Paraclostridium	VH	-0.841121851	0.003	-0.868144238	0.131
ASV_535	Cyanobium PCC-6307	VH	-1.003148995	0	-0.643936353	0.131
ASV_1783	Epulopiscium	VH	-0.917026668	0.001	-0.767171409	0.13
ASV_17	Cetobacterium	VH	-0.70483393	0.004	-0.409341503	0.129
ASV_1287	Shinella	VH	-0.909976261	0.002	-0.781157528	0.127
ASV_9	Aeromonas	VH	-0.680707424	0.004	-0.251194446	0.125
ASV_1078	LD29	VH	-0.980727543	0.002	-0.713998207	0.107
ASV_317	Epulopiscium	VH	-0.836323636	0.005	-0.602505994	0.1
ASV_7	Vibrio	VH	-0.893584468	0.002	-0.728870402	0.1
ASV_271	Clostridium sensu stricto 1	VH	-0.849326643	0.002	-0.720894336	0.096
ASV_843	Delftia	VH	-0.4995421	0.046	-0.572422256	0.088
ASV_577	Bacillus	VH	-1.018395011	0	-0.852084494	0.083
ASV_195	Bacillus	VH	-0.989481107	0.001	-0.911889281	0.08
ASV_1248	Lactococcus	VH	-0.866526843	0.003	-0.77299305	0.076
ASV_648	NA	VH	-0.788341029	0.004	-0.898005021	0.064
ASV_100	Aeromonas	VH	-0.771350264	0.002	-0.736321803	0.062
ASV_88	Terrisporobacter	VH	-0.858487809	0.002	-0.630214711	0.054
ASV_74	NA	VH	-0.857747789	0.006	-1.181957105	0.049
ASV_3	Cetobacterium	VH	-0.605870069	0.028	-0.435902421	0.048
ASV_109	Brevinema	VH	-0.541546944	0.018	-0.751198883	0.044
ASV_220	Bacillus	VH	-0.872804592	0.002	-1.185602721	0.041
ASV_2089	Chromobacterium	VH	-0.807979162	0.008	-1.185491819	0.04
ASV_834	Clostridium sensu stricto 5	VH	-0.797361618	0.008	-0.958914074	0.039
ASV_55	Clostridium sensu stricto 1	VH	-0.636671405	0.012	-0.859180034	0.036
ASV_115	Enterobacter	VH	-0.626477949	0.033	-0.914271135	0.032
ASV_365	Orbus	VH	-0.780337957	0.007	-0.866414052	0.031
ASV_20	Enterobacter	VH	-0.794644441	0.014	-0.8883345	0.024
ASV_79	Apibacter	VH	-0.800955092	0.009	-0.878844088	0.023
ASV_68	Shewanella	VH	-0.734340599	0.006	-0.965082366	0.022
ASV_221	NA	VH	-0.803724015	0.004	-1.337737183	0.021
ASV_261	Bacillus	VH	-0.842019431	0.004	-1.011960755	0.02
ASV_8	Cetobacterium	VH	-0.453179397	0.046	-0.646207269	0.02
ASV_1084	Turicibacter	VH	-0.837510265	0.004	-1.028365908	0.019
ASV_38	NA	VH	-0.775817864	0.004	-0.899173283	0.019
ASV_73	Aeromonas	VH	-0.863712688	0.002	-0.887617782	0.019
ASV_133	Bacillus	VH	-0.961591939	0	-0.937482262	0.018
ASV_282	Pseudomonas	VH	-0.756093117	0.004	-1.368680144	0.017
ASV_11	Aeromonas	VH	-0.72164682	0.006	-0.903488618	0.015
ASV_13	Romboutsia	VH	-0.728889905	0.004	-0.75941371	0.015
ASV_3524	Clostridium sensu stricto 1	VH	-0.727242698	0.009	-1.151192173	0.013
ASV_527	Chitinibacter	VH	-0.668627853	0.013	-1.130554225	0.013
ASV_62	Romboutsia	VH	-0.741055847	0.017	-1.017151553	0.013
ASV_12	Vibrio	VH	-0.68435638	0.007	-0.981507359	0.012
ASV_14	Paraclostridium	VH	-0.461996864	0.047	-0.770304371	0.011
ASV_60	Ligilactobacillus	VH	-0.439108107	0.063	-1.060983352	0.011
ASV_360	LD29	VH	-0.918779205	0.002	-1.452396384	0.008
ASV_486	Lactococcus	VH	-0.579275103	0.035	-1.208211909	0.007
ASV_386	Rheinheimera	VH	-0.603941598	0.031	-1.184330917	0.006
ASV_70	Romboutsia	VH	-0.874465083	0.004	-1.438250514	0.006
ASV_345	Bacillus	VH	-0.838784161	0.005	-1.22931216	0.004
ASV_466	NA	VH	-0.638859925	0.018	-0.901054495	0.004
ASV_449	Romboutsia	VH	-0.851964964	0.002	-1.348362332	0.003
ASV_6439	NA	VH	-0.692178733	0.019	-1.313240933	0.003
ASV_323	Romboutsia	VH	-0.781742831	0.007	-1.443243814	0.002
ASV_1339	Cyanobium PCC-6307	VH	-0.750171209	0.013	-1.666055217	0.001
ASV_2	Aeromonas	VH	-0.658069324	0.009	-0.788202982	0.001
ASV_243	Clostridium sensu stricto 1	VH	-0.679260518	0.021	-1.364139459	0.001
ASV_251	Cyanobium PCC-6307	VH	-0.766228272	0.007	-1.549926312	0.001
ASV_700	Clostridium sensu stricto 1	VH	-0.68547576	0.022	-1.272802911	0.001
ASV_768	Nodosilinea PCC-7104	VH	-0.777598497	0.006	-1.868404075	0.001
ASV_192	Enterobacter	VH	-584354 days, 9:53:00	00:04:00	-356482 days, 15:53:00	0
ASV_2112	Nitrospira	VH	-492010 days, 6:47:01	00:14:00	-25129 days, 6:36:00	0
ASV_2636	Roseomonas	VH	-536002 days, 8:09:00	00:08:00	-470013 days, 1:28:00	0
ASV_373	Cyanobium PCC-6307	VH	-578384 days, 6:23:01	00:03:00	-41974 days, 5:05:00	0
