# Supplementary material for: Gut microbiota differences between paired intestinal wall and digesta samples in three small species of fish
Source: PeerJ. 2022 Feb 22;10:e12992. doi: 10.7717/peerj.12992 (PMC8877339; doi:10.7717/peerj.12992)
Supplement: Table S1 [file peerj-10-12992-s001.xlsx]

## Sheet: Table S1
Table S1. Overview of sampling details for the 11 locations in Spain and length and weight of individual fish.
Species	Location	Abbreviation	Latitude	Longitude	Sampling date
Aphanius iberus	Mallada Casal D'Esplai	AI2	39.327909	-0.303027	2017-08-10
	Villena	AI4	38.645263	-0.889469	2018-09-11
	Pinoso	AI6	38.381161	-1.054970	2018-09-11
	Marjal del Moro->Charcas de la Alqueria	AI7	39.632719	-0.265120	2018-09-18
Gambusia holbrooki	Mallada Dunas	GH2	39.340401	-0.311038	2017-08-10
	Acequia Moncofar	GH3	39.225012	-0.386904	2017-08-10
	El Palmar (stream)	GH4	39.311013	-0.320617	2018-09-13
	Carraixet	GH5	39.502369	-0.331706	2018-09-13
Valencia hispanica	Dosser	VH4	39.207979	-0.234713	2018-09-12
	El Palmar (ponds)	VH5	39.311013	-0.320617	2018-09-12
	Nacimiento del Rio Verde	VH6	39.145706	-0.533241	2018-09-19
Individual	Total length (mm)	Weight (g)
AI2_10	22.55	0.15
AI2_12	23.8	0.199
AI2_1	41.06	0.922
AI2_2	39.54	0.837
AI2_3	40.68	0.97
AI2_4	34.36	0.62
AI2_7	23.53	0.181
AI2_9	22.91	0.159
AI4_10	31.26	0.483
AI4_1	31.2	0.466
AI4_5	36.84	0.806
AI4_6	31.09	0.496
AI4_7	33.23	0.657
AI4_8	28.75	0.38
AI4_9	27.51	0.28
AI6_10	30.58	0.379
AI6_11	37.71	0.892
AI6_12	29.53	0.366
AI6_2	29.6	0.394
AI6_4	33.54	0.562
AI6_5	40.89	1.15
AI6_6	33.83	0.62
AI7_10	26	0.243
AI7_11	28.55	0.392
AI7_1	38.18	0.827
AI7_2	32.11	0.48
AI7_3	35.34	0.729
AI7_4	25.93	0.271
AI7_5	25.05	0.251
GH2_10	45.95	1.028
GH2_11	33.81	0.44
GH2_13	37.98	0.566
GH2_1	45.96	1.112
GH2_2	47.53	1.155
GH2_3	43.52	0.836
GH3_10	41.34	0.832
GH3_2	41.7	0.708
GH3_3	39.79	0.714
GH3_6	42.08	0.893
GH3_7	38.09	0.648
GH3_9	41.56	0.844
GH4_10	29.73	0.278
GH4_11	28.56	0.235
GH4_12	30.21	0.272
GH4_3	27.41	0.188
GH4_4	35.49	0.605
GH4_5	23.2	0.13
GH4_6	30.42	0.291
GH4_7	29.32	0.304
GH4_9	33.98	0.571
GH5_10	42.33	0.962
GH5_2	25.06	0.135
GH5_3	41.93	0.702
GH5_4	24.74	0.305
GH5_5	45.84	1.078
GH5_6	27.76	0.186
GH5_7	42.06	0.735
VH4_11	54.87	2.5
VH4_12	53.4	2.264
VH4_4	51.51	1.805
VH4_6	46.06	1.353
VH4_7	52.23	1.88
VH4_8	57.38	2.385
VH5_11	52.1	1.8
VH5_2	48.5	1.49
VH5_5	40.56	0.837
VH5_6	49	1.493
VH5_8	40.12	0.799
VH5_9	46.26	1.34
VH6_10	39.05	0.792
VH6_11	47.4	1.596
VH6_12	36.61	0.63
VH6_1	50.9	2.044
VH6_2	62.92	3.36
VH6_3	38	0.637
VH6_4	46.35	1.373
VH6_5	49.97	1.583
VH6_7	32.49	0.461
VH6_8	45.56	1.276
VH6_9	51.57	1.828
