# Supplementary material for: Gut microbiota differences between paired intestinal wall and digesta samples in three small species of fish
Source: PeerJ. 2022 Feb 22;10:e12992. doi: 10.7717/peerj.12992 (PMC8877339; doi:10.7717/peerj.12992)
Supplement: Table S3 [file peerj-10-12992-s003.xlsx]

## Sheet: Table S3
Table S3. Overview of sequencing details for demultiplexed reads.
			Foward primer name	Forward primer sequence		Reverse primer name	Reverse primer sequence
			341F	5-CCTAYGGGRBGCASCAG-3		805R	5-GGACTACNNGGGTATCTAAT-3
Extraction round	Sequencing run	replicate number	Sample ID	F read name	R read name
6	1	1	AI2_10_W	AI2_10a_1_1.fq.gz	AI2_10a_1_2.fq.gz
6	1	2	AI2_10_W	AI2_10a_2_1.fq.gz	AI2_10a_2_2.fq.gz
6	1	3	AI2_10_W	AI2_10a_3_1.fq.gz	AI2_10a_3_2.fq.gz
6	1	1	AI2_10_D	AI2_10b_1_1.fq.gz	AI2_10b_1_2.fq.gz
6	1	2	AI2_10_D	AI2_10b_2_1.fq.gz	AI2_10b_2_2.fq.gz
6	1	3	AI2_10_D	AI2_10b_3_1.fq.gz	AI2_10b_3_2.fq.gz
6	1	1	AI2_12_W	AI2_12a_1_1.fq.gz	AI2_12a_1_2.fq.gz
6	1	2	AI2_12_W	AI2_12a_2_1.fq.gz	AI2_12a_2_2.fq.gz
6	1	3	AI2_12_W	AI2_12a_3_1.fq.gz	AI2_12a_3_2.fq.gz
6	1	1	AI2_12_D	AI2_12b_1_1.fq.gz	AI2_12b_1_2.fq.gz
6	1	2	AI2_12_D	AI2_12b_2_1.fq.gz	AI2_12b_2_2.fq.gz
6	1	3	AI2_12_D	AI2_12b_3_1.fq.gz	AI2_12b_3_2.fq.gz
11	1	1	AI2_1_W	AI2_1a_1_1.fq.gz	AI2_1a_1_2.fq.gz
11	1	2	AI2_1_W	AI2_1a_2_1.fq.gz	AI2_1a_2_2.fq.gz
11	1	3	AI2_1_W	AI2_1a_3_1.fq.gz	AI2_1a_3_2.fq.gz
11	1	1	AI2_1_D	AI2_1b_1_1.fq.gz	AI2_1b_1_2.fq.gz
1	1	1	AI2_2_W	AI2_2a_1_1.fq.gz	AI2_2a_1_2.fq.gz
1	1	2	AI2_2_W	AI2_2a_2_1.fq.gz	AI2_2a_2_2.fq.gz
1	1	3	AI2_2_W	AI2_2a_3_1.fq.gz	AI2_2a_3_2.fq.gz
1	1	1	AI2_2_D	AI2_2b_1_1.fq.gz	AI2_2b_1_2.fq.gz
1	1	2	AI2_2_D	AI2_2b_2_1.fq.gz	AI2_2b_2_2.fq.gz
1	1	3	AI2_2_D	AI2_2b_3_1.fq.gz	AI2_2b_3_2.fq.gz
5	1	1	AI2_3_W	AI2_3a_1_1.fq.gz	AI2_3a_1_2.fq.gz
5	1	2	AI2_3_W	AI2_3a_2_1.fq.gz	AI2_3a_2_2.fq.gz
5	1	3	AI2_3_W	AI2_3a_3_1.fq.gz	AI2_3a_3_2.fq.gz
5	1	1	AI2_3_D	AI2_3b_1_1.fq.gz	AI2_3b_1_2.fq.gz
5	1	2	AI2_3_D	AI2_3b_2_1.fq.gz	AI2_3b_2_2.fq.gz
5	1	3	AI2_3_D	AI2_3b_3_1.fq.gz	AI2_3b_3_2.fq.gz
5	5	1	AI2_4_W	AI2_4a_1_1.fq.gz	AI2_4a_1_2.fq.gz
5	5	2	AI2_4_W	AI2_4a_2_1.fq.gz	AI2_4a_2_2.fq.gz
5	5	3	AI2_4_W	AI2_4a_3_1.fq.gz	AI2_4a_3_2.fq.gz
4	1	1	AI2_7_W	AI2_7a_1_1.fq.gz	AI2_7a_1_2.fq.gz
4	1	2	AI2_7_W	AI2_7a_2_1.fq.gz	AI2_7a_2_2.fq.gz
4	1	3	AI2_7_W	AI2_7a_3_1.fq.gz	AI2_7a_3_2.fq.gz
4	1	1	AI2_7_D	AI2_7b_1_1.fq.gz	AI2_7b_1_2.fq.gz
4	1	2	AI2_7_D	AI2_7b_2_1.fq.gz	AI2_7b_2_2.fq.gz
4	1	3	AI2_7_D	AI2_7b_3_1.fq.gz	AI2_7b_3_2.fq.gz
6	1	1	AI2_9_W	AI2_9a_1_1.fq.gz	AI2_9a_1_2.fq.gz
6	1	2	AI2_9_W	AI2_9a_2_1.fq.gz	AI2_9a_2_2.fq.gz
6	1	3	AI2_9_W	AI2_9a_3_1.fq.gz	AI2_9a_3_2.fq.gz
6	1	1	AI2_9_D	AI2_9b_1_1.fq.gz	AI2_9b_1_2.fq.gz
6	1	2	AI2_9_D	AI2_9b_2_1.fq.gz	AI2_9b_2_2.fq.gz
6	1	3	AI2_9_D	AI2_9b_3_1.fq.gz	AI2_9b_3_2.fq.gz
6	1	1	AI4_10_W	AI4_10a_1_1.fq.gz	AI4_10a_1_2.fq.gz
6	1	2	AI4_10_W	AI4_10a_2_1.fq.gz	AI4_10a_2_2.fq.gz
6	1	3	AI4_10_W	AI4_10a_3_1.fq.gz	AI4_10a_3_2.fq.gz
6	1	1	AI4_10_D	AI4_10b_1_1.fq.gz	AI4_10b_1_2.fq.gz
6	1	2	AI4_10_D	AI4_10b_2_1.fq.gz	AI4_10b_2_2.fq.gz
6	1	3	AI4_10_D	AI4_10b_3_1.fq.gz	AI4_10b_3_2.fq.gz
18	5	1	AI4_1_W	AI4_1a_1_1.fq.gz	AI4_1a_1_2.fq.gz
18	5	2	AI4_1_W	AI4_1a_2_1.fq.gz	AI4_1a_2_2.fq.gz
18	5	3	AI4_1_W	AI4_1a_3_1.fq.gz	AI4_1a_3_2.fq.gz
18	5	1	AI4_1_D	AI4_1b_1_1.fq.gz	AI4_1b_1_2.fq.gz
18	5	2	AI4_1_D	AI4_1b_2_1.fq.gz	AI4_1b_2_2.fq.gz
18	5	3	AI4_1_D	AI4_1b_3_1.fq.gz	AI4_1b_3_2.fq.gz
18	5	1	AI4_5_W	AI4_5a_1_1.fq.gz	AI4_5a_1_2.fq.gz
18	5	2	AI4_5_W	AI4_5a_2_1.fq.gz	AI4_5a_2_2.fq.gz
18	5	3	AI4_5_W	AI4_5a_3_1.fq.gz	AI4_5a_3_2.fq.gz
18	5	1	AI4_5_D	AI4_5b_1_1.fq.gz	AI4_5b_1_2.fq.gz
18	5	2	AI4_5_D	AI4_5b_2_1.fq.gz	AI4_5b_2_2.fq.gz
18	5	3	AI4_5_D	AI4_5b_3_1.fq.gz	AI4_5b_3_2.fq.gz
18	5	1	AI4_6_W	AI4_6a_1_1.fq.gz	AI4_6a_1_2.fq.gz
18	5	2	AI4_6_W	AI4_6a_2_1.fq.gz	AI4_6a_2_2.fq.gz
18	5	3	AI4_6_W	AI4_6a_3_1.fq.gz	AI4_6a_3_2.fq.gz
18	5	1	AI4_6_D	AI4_6b_1_1.fq.gz	AI4_6b_1_2.fq.gz
18	5	2	AI4_6_D	AI4_6b_2_1.fq.gz	AI4_6b_2_2.fq.gz
18	5	3	AI4_6_D	AI4_6b_3_1.fq.gz	AI4_6b_3_2.fq.gz
18	5	1	AI4_7_W	AI4_7a_1_1.fq.gz	AI4_7a_1_2.fq.gz
18	5	2	AI4_7_W	AI4_7a_2_1.fq.gz	AI4_7a_2_2.fq.gz
18	5	3	AI4_7_W	AI4_7a_3_1.fq.gz	AI4_7a_3_2.fq.gz
18	5	1	AI4_7_D	AI4_7b_1_1.fq.gz	AI4_7b_1_2.fq.gz
18	5	2	AI4_7_D	AI4_7b_2_1.fq.gz	AI4_7b_2_2.fq.gz
18	5	3	AI4_7_D	AI4_7b_3_1.fq.gz	AI4_7b_3_2.fq.gz
19	5	1	AI4_8_W	AI4_8a_1_1.fq.gz	AI4_8a_1_2.fq.gz
19	5	2	AI4_8_W	AI4_8a_2_1.fq.gz	AI4_8a_2_2.fq.gz
19	5	3	AI4_8_W	AI4_8a_3_1.fq.gz	AI4_8a_3_2.fq.gz
19	5	1	AI4_8_D	AI4_8b_1_1.fq.gz	AI4_8b_1_2.fq.gz
19	5	2	AI4_8_D	AI4_8b_2_1.fq.gz	AI4_8b_2_2.fq.gz
19	5	3	AI4_8_D	AI4_8b_3_1.fq.gz	AI4_8b_3_2.fq.gz
19	5	1	AI4_9_W	AI4_9a_1_1.fq.gz	AI4_9a_1_2.fq.gz
19	5	2	AI4_9_W	AI4_9a_2_1.fq.gz	AI4_9a_2_2.fq.gz
19	5	3	AI4_9_W	AI4_9a_3_1.fq.gz	AI4_9a_3_2.fq.gz
19	5	1	AI4_9_D	AI4_9b_1_1.fq.gz	AI4_9b_1_2.fq.gz
19	5	2	AI4_9_D	AI4_9b_2_1.fq.gz	AI4_9b_2_2.fq.gz
19	5	3	AI4_9_D	AI4_9b_3_1.fq.gz	AI4_9b_3_2.fq.gz
19	5	1	AI6_10_W	AI6_10a_1_1.fq.gz	AI6_10a_1_2.fq.gz
19	5	2	AI6_10_W	AI6_10a_2_1.fq.gz	AI6_10a_2_2.fq.gz
19	5	3	AI6_10_W	AI6_10a_3_1.fq.gz	AI6_10a_3_2.fq.gz
19	5	1	AI6_10_D	AI6_10b_1_1.fq.gz	AI6_10b_1_2.fq.gz
19	5	2	AI6_10_D	AI6_10b_2_1.fq.gz	AI6_10b_2_2.fq.gz
19	5	3	AI6_10_D	AI6_10b_3_1.fq.gz	AI6_10b_3_2.fq.gz
19	5	1	AI6_11_W	AI6_11a_1_1.fq.gz	AI6_11a_1_2.fq.gz
19	5	2	AI6_11_W	AI6_11a_2_1.fq.gz	AI6_11a_2_2.fq.gz
19	5	3	AI6_11_W	AI6_11a_3_1.fq.gz	AI6_11a_3_2.fq.gz
19	5	1	AI6_11_D	AI6_11b_1_1.fq.gz	AI6_11b_1_2.fq.gz
19	5	2	AI6_11_D	AI6_11b_2_1.fq.gz	AI6_11b_2_2.fq.gz
19	5	3	AI6_11_D	AI6_11b_3_1.fq.gz	AI6_11b_3_2.fq.gz
20	5	1	AI6_12_W	AI6_12a_1_1.fq.gz	AI6_12a_1_2.fq.gz
20	5	2	AI6_12_W	AI6_12a_2_1.fq.gz	AI6_12a_2_2.fq.gz
20	5	3	AI6_12_W	AI6_12a_3_1.fq.gz	AI6_12a_3_2.fq.gz
20	5	1	AI6_12_D	AI6_12b_1_1.fq.gz	AI6_12b_1_2.fq.gz
20	5	2	AI6_12_D	AI6_12b_2_1.fq.gz	AI6_12b_2_2.fq.gz
20	5	3	AI6_12_D	AI6_12b_3_1.fq.gz	AI6_12b_3_2.fq.gz
18	5	1	AI6_2_W	AI6_2a_1_1.fq.gz	AI6_2a_1_2.fq.gz
18	5	2	AI6_2_W	AI6_2a_2_1.fq.gz	AI6_2a_2_2.fq.gz
18	5	3	AI6_2_W	AI6_2a_3_1.fq.gz	AI6_2a_3_2.fq.gz
18	5	1	AI6_2_D	AI6_2b_1_1.fq.gz	AI6_2b_1_2.fq.gz
18	5	2	AI6_2_D	AI6_2b_2_1.fq.gz	AI6_2b_2_2.fq.gz
18	5	3	AI6_2_D	AI6_2b_3_1.fq.gz	AI6_2b_3_2.fq.gz
18	5	1	AI6_4_W	AI6_4a_1_1.fq.gz	AI6_4a_1_2.fq.gz
18	5	2	AI6_4_W	AI6_4a_2_1.fq.gz	AI6_4a_2_2.fq.gz
18	5	3	AI6_4_W	AI6_4a_3_1.fq.gz	AI6_4a_3_2.fq.gz
18	5	1	AI6_4_D	AI6_4b_1_1.fq.gz	AI6_4b_1_2.fq.gz
18	5	2	AI6_4_D	AI6_4b_2_1.fq.gz	AI6_4b_2_2.fq.gz
18	5	3	AI6_4_D	AI6_4b_3_1.fq.gz	AI6_4b_3_2.fq.gz
19	5	1	AI6_5_W	AI6_5a_1_1.fq.gz	AI6_5a_1_2.fq.gz
19	5	2	AI6_5_W	AI6_5a_2_1.fq.gz	AI6_5a_2_2.fq.gz
19	5	3	AI6_5_W	AI6_5a_3_1.fq.gz	AI6_5a_3_2.fq.gz
19	5	1	AI6_5_D	AI6_5b_1_1.fq.gz	AI6_5b_1_2.fq.gz
19	5	2	AI6_5_D	AI6_5b_2_1.fq.gz	AI6_5b_2_2.fq.gz
19	5	3	AI6_5_D	AI6_5b_3_1.fq.gz	AI6_5b_3_2.fq.gz
19	5	1	AI6_6_W	AI6_6a_1_1.fq.gz	AI6_6a_1_2.fq.gz
19	5	2	AI6_6_W	AI6_6a_2_1.fq.gz	AI6_6a_2_2.fq.gz
19	5	3	AI6_6_W	AI6_6a_3_1.fq.gz	AI6_6a_3_2.fq.gz
19	5	1	AI6_6_D	AI6_6b_1_1.fq.gz	AI6_6b_1_2.fq.gz
19	5	2	AI6_6_D	AI6_6b_2_1.fq.gz	AI6_6b_2_2.fq.gz
19	5	3	AI6_6_D	AI6_6b_3_1.fq.gz	AI6_6b_3_2.fq.gz
19	5	1	AI7_10_W	AI7_10a_1_1.fq.gz	AI7_10a_1_2.fq.gz
19	5	2	AI7_10_W	AI7_10a_2_1.fq.gz	AI7_10a_2_2.fq.gz
19	5	3	AI7_10_W	AI7_10a_3_1.fq.gz	AI7_10a_3_2.fq.gz
19	5	1	AI7_10_D	AI7_10b_1_1.fq.gz	AI7_10b_1_2.fq.gz
19	5	2	AI7_10_D	AI7_10b_2_1.fq.gz	AI7_10b_2_2.fq.gz
19	5	3	AI7_10_D	AI7_10b_3_1.fq.gz	AI7_10b_3_2.fq.gz
20	5	1	AI7_11_W	AI7_11a_1_1.fq.gz	AI7_11a_1_2.fq.gz
20	5	2	AI7_11_W	AI7_11a_2_1.fq.gz	AI7_11a_2_2.fq.gz
20	5	3	AI7_11_W	AI7_11a_3_1.fq.gz	AI7_11a_3_2.fq.gz
20	5	1	AI7_11_D	AI7_11b_1_1.fq.gz	AI7_11b_1_2.fq.gz
20	5	2	AI7_11_D	AI7_11b_2_1.fq.gz	AI7_11b_2_2.fq.gz
20	5	3	AI7_11_D	AI7_11b_3_1.fq.gz	AI7_11b_3_2.fq.gz
18	5	1	AI7_1_W	AI7_1a_1_1.fq.gz	AI7_1a_1_2.fq.gz
18	5	2	AI7_1_W	AI7_1a_2_1.fq.gz	AI7_1a_2_2.fq.gz
18	5	3	AI7_1_W	AI7_1a_3_1.fq.gz	AI7_1a_3_2.fq.gz
18	5	1	AI7_1_D	AI7_1b_1_1.fq.gz	AI7_1b_1_2.fq.gz
18	5	2	AI7_1_D	AI7_1b_2_1.fq.gz	AI7_1b_2_2.fq.gz
18	5	3	AI7_1_D	AI7_1b_3_1.fq.gz	AI7_1b_3_2.fq.gz
18	5	1	AI7_2_W	AI7_2a_1_1.fq.gz	AI7_2a_1_2.fq.gz
18	5	2	AI7_2_W	AI7_2a_2_1.fq.gz	AI7_2a_2_2.fq.gz
18	5	3	AI7_2_W	AI7_2a_3_1.fq.gz	AI7_2a_3_2.fq.gz
18	5	1	AI7_2_D	AI7_2b_1_1.fq.gz	AI7_2b_1_2.fq.gz
18	5	2	AI7_2_D	AI7_2b_2_1.fq.gz	AI7_2b_2_2.fq.gz
18	5	3	AI7_2_D	AI7_2b_3_1.fq.gz	AI7_2b_3_2.fq.gz
19	5	1	AI7_3_W	AI7_3a_1_1.fq.gz	AI7_3a_1_2.fq.gz
19	5	2	AI7_3_W	AI7_3a_2_1.fq.gz	AI7_3a_2_2.fq.gz
19	5	3	AI7_3_W	AI7_3a_3_1.fq.gz	AI7_3a_3_2.fq.gz
19	5	1	AI7_3_D	AI7_3b_1_1.fq.gz	AI7_3b_1_2.fq.gz
19	5	2	AI7_3_D	AI7_3b_2_1.fq.gz	AI7_3b_2_2.fq.gz
19	5	3	AI7_3_D	AI7_3b_3_1.fq.gz	AI7_3b_3_2.fq.gz
19	5	1	AI7_4_W	AI7_4a_1_1.fq.gz	AI7_4a_1_2.fq.gz
19	5	2	AI7_4_W	AI7_4a_2_1.fq.gz	AI7_4a_2_2.fq.gz
19	5	3	AI7_4_W	AI7_4a_3_1.fq.gz	AI7_4a_3_2.fq.gz
19	5	1	AI7_4_D	AI7_4b_1_1.fq.gz	AI7_4b_1_2.fq.gz
19	5	2	AI7_4_D	AI7_4b_2_1.fq.gz	AI7_4b_2_2.fq.gz
19	5	3	AI7_4_D	AI7_4b_3_1.fq.gz	AI7_4b_3_2.fq.gz
19	5	1	AI7_5_W	AI7_5a_1_1.fq.gz	AI7_5a_1_2.fq.gz
19	5	2	AI7_5_W	AI7_5a_2_1.fq.gz	AI7_5a_2_2.fq.gz
19	5	3	AI7_5_W	AI7_5a_3_1.fq.gz	AI7_5a_3_2.fq.gz
19	5	1	AI7_5_D	AI7_5b_1_1.fq.gz	AI7_5b_1_2.fq.gz
19	5	2	AI7_5_D	AI7_5b_2_1.fq.gz	AI7_5b_2_2.fq.gz
19	5	3	AI7_5_D	AI7_5b_3_1.fq.gz	AI7_5b_3_2.fq.gz
1	1	1	Blank04092017	Blank04092017_1_1.fq.gz	Blank04092017_1_2.fq.gz
1	1	2	Blank04092017	Blank04092017_2_1.fq.gz	Blank04092017_2_2.fq.gz
1	1	3	Blank04092017	Blank04092017_3_1.fq.gz	Blank04092017_3_2.fq.gz
3	1	1	Blank121017	Blank121017_1_1.fq.gz	Blank121017_1_2.fq.gz
3	1	2	Blank121017	Blank121017_2_1.fq.gz	Blank121017_2_2.fq.gz
3	1	3	Blank121017	Blank121017_3_1.fq.gz	Blank121017_3_2.fq.gz
4	2	1	Blank20171026	Blank20171026_1_1.fq.gz	Blank20171026_1_2.fq.gz
4	2	2	Blank20171026	Blank20171026_2_1.fq.gz	Blank20171026_2_2.fq.gz
4	2	3	Blank20171026	Blank20171026_3_1.fq.gz	Blank20171026_3_2.fq.gz
5	1	1	Blank20180110	Blank20180110_1_1.fq.gz	Blank20180110_1_2.fq.gz
5	1	2	Blank20180110	Blank20180110_2_1.fq.gz	Blank20180110_2_2.fq.gz
5	1	3	Blank20180110	Blank20180110_3_1.fq.gz	Blank20180110_3_2.fq.gz
6	1	1	Blank20180117	Blank20180117_1_1.fq.gz	Blank20180117_1_2.fq.gz
6	1	2	Blank20180117	Blank20180117_2_1.fq.gz	Blank20180117_2_2.fq.gz
6	1	3	Blank20180117	Blank20180117_3_1.fq.gz	Blank20180117_3_2.fq.gz
7	2	1	Blank20180118	Blank20180118_1_1.fq.gz	Blank20180118_1_2.fq.gz
7	2	2	Blank20180118	Blank20180118_2_1.fq.gz	Blank20180118_2_2.fq.gz
7	2	3	Blank20180118	Blank20180118_3_1.fq.gz	Blank20180118_3_2.fq.gz
8	2	1	Blank20180122	Blank20180122_1_1.fq.gz	Blank20180122_1_2.fq.gz
8	2	2	Blank20180122	Blank20180122_2_1.fq.gz	Blank20180122_2_2.fq.gz
8	2	3	Blank20180122	Blank20180122_3_1.fq.gz	Blank20180122_3_2.fq.gz
9	2	1	Blank20180124	Blank20180124_1_1.fq.gz	Blank20180124_1_2.fq.gz
9	2	2	Blank20180124	Blank20180124_2_1.fq.gz	Blank20180124_2_2.fq.gz
9	2	3	Blank20180124	Blank20180124_3_1.fq.gz	Blank20180124_3_2.fq.gz
10	3	1	Blank20181019	Blank20181019_1_1.fq.gz	Blank20181019_1_2.fq.gz
10	3	2	Blank20181019	Blank20181019_2_1.fq.gz	Blank20181019_2_2.fq.gz
10	3	3	Blank20181019	Blank20181019_3_1.fq.gz	Blank20181019_3_2.fq.gz
11	1	1	Blank20181101	Blank20181101_1_1.fq.gz	Blank20181101_1_2.fq.gz
11	1	2	Blank20181101	Blank20181101_2_1.fq.gz	Blank20181101_2_2.fq.gz
11	1	3	Blank20181101	Blank20181101_3_1.fq.gz	Blank20181101_3_2.fq.gz
12	3	1	Blank20190123	Blank20190123_1_1.fq.gz	Blank20190123_1_2.fq.gz
12	3	2	Blank20190123	Blank20190123_2_1.fq.gz	Blank20190123_2_2.fq.gz
12	3	3	Blank20190123	Blank20190123_3_1.fq.gz	Blank20190123_3_2.fq.gz
13	3	1	Blank20190124	Blank20190124_1_1.fq.gz	Blank20190124_1_2.fq.gz
13	3	2	Blank20190124	Blank20190124_2_1.fq.gz	Blank20190124_2_2.fq.gz
13	3	3	Blank20190124	Blank20190124_3_1.fq.gz	Blank20190124_3_2.fq.gz
14	3	1	Blank20190125	Blank20190125_1_1.fq.gz	Blank20190125_1_2.fq.gz
14	3	2	Blank20190125	Blank20190125_2_1.fq.gz	Blank20190125_2_2.fq.gz
14	3	3	Blank20190125	Blank20190125_3_1.fq.gz	Blank20190125_3_2.fq.gz
15	3	1	Blank20190130	Blank20190130_1_1.fq.gz	Blank20190130_1_2.fq.gz
15	3	2	Blank20190130	Blank20190130_2_1.fq.gz	Blank20190130_2_2.fq.gz
15	3	3	Blank20190130	Blank20190130_3_1.fq.gz	Blank20190130_3_2.fq.gz
16	3	1	Blank20190201	Blank20190201_1_1.fq.gz	Blank20190201_1_2.fq.gz
16	3	2	Blank20190201	Blank20190201_2_1.fq.gz	Blank20190201_2_2.fq.gz
16	3	3	Blank20190201	Blank20190201_3_1.fq.gz	Blank20190201_3_2.fq.gz
17	3	1	Blank20190204	Blank20190204_1_1.fq.gz	Blank20190204_1_2.fq.gz
17	3	2	Blank20190204	Blank20190204_2_1.fq.gz	Blank20190204_2_2.fq.gz
17	3	3	Blank20190204	Blank20190204_3_1.fq.gz	Blank20190204_3_2.fq.gz
18	3	1	Blank20191018	Blank20191018_1_1.fq.gz	Blank20191018_1_2.fq.gz
18	3	2	Blank20191018	Blank20191018_2_1.fq.gz	Blank20191018_2_2.fq.gz
18	3	3	Blank20191018	Blank20191018_3_1.fq.gz	Blank20191018_3_2.fq.gz
19	3	1	Blank20191022	Blank20191022_1_1.fq.gz	Blank20191022_1_2.fq.gz
19	3	2	Blank20191022	Blank20191022_2_1.fq.gz	Blank20191022_2_2.fq.gz
19	3	3	Blank20191022	Blank20191022_3_1.fq.gz	Blank20191022_3_2.fq.gz
20	3	1	Blank20191024	Blank20191024_1_1.fq.gz	Blank20191024_1_2.fq.gz
20	3	2	Blank20191024	Blank20191024_2_1.fq.gz	Blank20191024_2_2.fq.gz
20	3	3	Blank20191024	Blank20191024_3_1.fq.gz	Blank20191024_3_2.fq.gz
21	3	1	Blank20191028	Blank20191028_1_1.fq.gz	Blank20191028_1_2.fq.gz
21	3	2	Blank20191028	Blank20191028_2_1.fq.gz	Blank20191028_2_2.fq.gz
21	3	3	Blank20191028	Blank20191028_3_1.fq.gz	Blank20191028_3_2.fq.gz
22	5	1	Blank20200820	Blank20200820_1_1.fq.gz	Blank20200820_1_2.fq.gz
22	5	2	Blank20200820	Blank20200820_2_1.fq.gz	Blank20200820_2_2.fq.gz
22	5	3	Blank20200820	Blank20200820_3_1.fq.gz	Blank20200820_3_2.fq.gz
3	1	1	GH2_10_W	GH2_10a_1_1.fq.gz	GH2_10a_1_2.fq.gz
3	1	2	GH2_10_W	GH2_10a_2_1.fq.gz	GH2_10a_2_2.fq.gz
3	1	3	GH2_10_W	GH2_10a_3_1.fq.gz	GH2_10a_3_2.fq.gz
3	1	1	GH2_10_D	GH2_10b_1_1.fq.gz	GH2_10b_1_2.fq.gz
3	1	2	GH2_10_D	GH2_10b_2_1.fq.gz	GH2_10b_2_2.fq.gz
3	1	3	GH2_10_D	GH2_10b_3_1.fq.gz	GH2_10b_3_2.fq.gz
3	1	1	GH2_11_W	GH2_11a_1_1.fq.gz	GH2_11a_1_2.fq.gz
3	1	2	GH2_11_W	GH2_11a_2_1.fq.gz	GH2_11a_2_2.fq.gz
3	1	3	GH2_11_W	GH2_11a_3_1.fq.gz	GH2_11a_3_2.fq.gz
3	1	1	GH2_11_D	GH2_11b_1_1.fq.gz	GH2_11b_1_2.fq.gz
3	1	2	GH2_11_D	GH2_11b_2_1.fq.gz	GH2_11b_2_2.fq.gz
3	1	3	GH2_11_D	GH2_11b_3_1.fq.gz	GH2_11b_3_2.fq.gz
9	2	1	GH2_13_W	GH2_13a_1_1.fq.gz	GH2_13a_1_2.fq.gz
9	2	2	GH2_13_W	GH2_13a_2_1.fq.gz	GH2_13a_2_2.fq.gz
9	2	3	GH2_13_W	GH2_13a_3_1.fq.gz	GH2_13a_3_2.fq.gz
9	2	1	GH2_13_D	GH2_13b_1_1.fq.gz	GH2_13b_1_2.fq.gz
9	2	2	GH2_13_D	GH2_13b_2_1.fq.gz	GH2_13b_2_2.fq.gz
9	2	3	GH2_13_D	GH2_13b_3_1.fq.gz	GH2_13b_3_2.fq.gz
7	2	1	GH2_1_W	GH2_1a_1_1.fq.gz	GH2_1a_1_2.fq.gz
7	2	2	GH2_1_W	GH2_1a_2_1.fq.gz	GH2_1a_2_2.fq.gz
7	2	3	GH2_1_W	GH2_1a_3_1.fq.gz	GH2_1a_3_2.fq.gz
7	2	1	GH2_1_D	GH2_1b_1_1.fq.gz	GH2_1b_1_2.fq.gz
7	2	2	GH2_1_D	GH2_1b_2_1.fq.gz	GH2_1b_2_2.fq.gz
7	2	3	GH2_1_D	GH2_1b_3_1.fq.gz	GH2_1b_3_2.fq.gz
3	1	1	GH2_2_W	GH2_2a_1_1.fq.gz	GH2_2a_1_2.fq.gz
3	1	2	GH2_2_W	GH2_2a_2_1.fq.gz	GH2_2a_2_2.fq.gz
3	1	3	GH2_2_W	GH2_2a_3_1.fq.gz	GH2_2a_3_2.fq.gz
3	1	1	GH2_2_D	GH2_2b_1_1.fq.gz	GH2_2b_1_2.fq.gz
3	1	2	GH2_2_D	GH2_2b_2_1.fq.gz	GH2_2b_2_2.fq.gz
3	1	3	GH2_2_D	GH2_2b_3_1.fq.gz	GH2_2b_3_2.fq.gz
7	1	1	GH2_3_W	GH2_3a_1_1.fq.gz	GH2_3a_1_2.fq.gz
7	1	2	GH2_3_W	GH2_3a_2_1.fq.gz	GH2_3a_2_2.fq.gz
7	1	3	GH2_3_W	GH2_3a_3_1.fq.gz	GH2_3a_3_2.fq.gz
7	1	1	GH2_3_D	GH2_3b_1_1.fq.gz	GH2_3b_1_2.fq.gz
7	1	2	GH2_3_D	GH2_3b_2_1.fq.gz	GH2_3b_2_2.fq.gz
7	1	3	GH2_3_D	GH2_3b_3_1.fq.gz	GH2_3b_3_2.fq.gz
9	1	1	GH3_10_W	GH3_10a_1_1.fq.gz	GH3_10a_1_2.fq.gz
9	1	2	GH3_10_W	GH3_10a_2_1.fq.gz	GH3_10a_2_2.fq.gz
9	1	3	GH3_10_W	GH3_10a_3_1.fq.gz	GH3_10a_3_2.fq.gz
9	1	1	GH3_10_D	GH3_10b_1_1.fq.gz	GH3_10b_1_2.fq.gz
9	1	2	GH3_10_D	GH3_10b_2_1.fq.gz	GH3_10b_2_2.fq.gz
9	1	3	GH3_10_D	GH3_10b_3_1.fq.gz	GH3_10b_3_2.fq.gz
1	1	1	GH3_2_W	GH3_2a_1_1.fq.gz	GH3_2a_1_2.fq.gz
1	1	2	GH3_2_W	GH3_2a_2_1.fq.gz	GH3_2a_2_2.fq.gz
1	1	3	GH3_2_W	GH3_2a_3_1.fq.gz	GH3_2a_3_2.fq.gz
1	1	1	GH3_2_D	GH3_2b_1_1.fq.gz	GH3_2b_1_2.fq.gz
1	1	2	GH3_2_D	GH3_2b_2_1.fq.gz	GH3_2b_2_2.fq.gz
1	1	3	GH3_2_D	GH3_2b_3_1.fq.gz	GH3_2b_3_2.fq.gz
8	2	1	GH3_3_W	GH3_3a_1_1.fq.gz	GH3_3a_1_2.fq.gz
8	2	2	GH3_3_W	GH3_3a_2_1.fq.gz	GH3_3a_2_2.fq.gz
8	2	3	GH3_3_W	GH3_3a_3_1.fq.gz	GH3_3a_3_2.fq.gz
8	2	1	GH3_3_D	GH3_3b_1_1.fq.gz	GH3_3b_1_2.fq.gz
8	2	2	GH3_3_D	GH3_3b_2_1.fq.gz	GH3_3b_2_2.fq.gz
8	2	3	GH3_3_D	GH3_3b_3_1.fq.gz	GH3_3b_3_2.fq.gz
3	1	1	GH3_6_W	GH3_6a_1_1.fq.gz	GH3_6a_1_2.fq.gz
3	1	2	GH3_6_W	GH3_6a_2_1.fq.gz	GH3_6a_2_2.fq.gz
3	1	3	GH3_6_W	GH3_6a_3_1.fq.gz	GH3_6a_3_2.fq.gz
3	1	1	GH3_6_D	GH3_6b_1_1.fq.gz	GH3_6b_1_2.fq.gz
3	1	2	GH3_6_D	GH3_6b_2_1.fq.gz	GH3_6b_2_2.fq.gz
3	1	3	GH3_6_D	GH3_6b_3_1.fq.gz	GH3_6b_3_2.fq.gz
7	2	1	GH3_7_W	GH3_7a_1_1.fq.gz	GH3_7a_1_2.fq.gz
7	2	2	GH3_7_W	GH3_7a_2_1.fq.gz	GH3_7a_2_2.fq.gz
7	2	3	GH3_7_W	GH3_7a_3_1.fq.gz	GH3_7a_3_2.fq.gz
7	2	1	GH3_7_D	GH3_7b_1_1.fq.gz	GH3_7b_1_2.fq.gz
7	2	2	GH3_7_D	GH3_7b_2_1.fq.gz	GH3_7b_2_2.fq.gz
7	2	3	GH3_7_D	GH3_7b_3_1.fq.gz	GH3_7b_3_2.fq.gz
9	2	1	GH3_9_W	GH3_9a_1_1.fq.gz	GH3_9a_1_2.fq.gz
9	2	2	GH3_9_W	GH3_9a_2_1.fq.gz	GH3_9a_2_2.fq.gz
9	2	3	GH3_9_W	GH3_9a_3_1.fq.gz	GH3_9a_3_2.fq.gz
9	2	1	GH3_9_D	GH3_9b_1_1.fq.gz	GH3_9b_1_2.fq.gz
9	2	2	GH3_9_D	GH3_9b_2_1.fq.gz	GH3_9b_2_2.fq.gz
9	2	3	GH3_9_D	GH3_9b_3_1.fq.gz	GH3_9b_3_2.fq.gz
17	3	1	GH4_10_W	GH4_10a_1_1.fq.gz	GH4_10a_1_2.fq.gz
17	3	2	GH4_10_W	GH4_10a_2_1.fq.gz	GH4_10a_2_2.fq.gz
17	3	3	GH4_10_W	GH4_10a_3_1.fq.gz	GH4_10a_3_2.fq.gz
17	3	1	GH4_10_D	GH4_10b_1_1.fq.gz	GH4_10b_1_2.fq.gz
17	3	2	GH4_10_D	GH4_10b_2_1.fq.gz	GH4_10b_2_2.fq.gz
17	3	3	GH4_10_D	GH4_10b_3_1.fq.gz	GH4_10b_3_2.fq.gz
17	3	1	GH4_11_W	GH4_11a_1_1.fq.gz	GH4_11a_1_2.fq.gz
17	3	2	GH4_11_W	GH4_11a_2_1.fq.gz	GH4_11a_2_2.fq.gz
17	3	3	GH4_11_W	GH4_11a_3_1.fq.gz	GH4_11a_3_2.fq.gz
17	3	1	GH4_11_D	GH4_11b_1_1.fq.gz	GH4_11b_1_2.fq.gz
17	3	2	GH4_11_D	GH4_11b_2_1.fq.gz	GH4_11b_2_2.fq.gz
17	3	3	GH4_11_D	GH4_11b_3_1.fq.gz	GH4_11b_3_2.fq.gz
17	3	1	GH4_12_W	GH4_12a_1_1.fq.gz	GH4_12a_1_2.fq.gz
17	3	2	GH4_12_W	GH4_12a_2_1.fq.gz	GH4_12a_2_2.fq.gz
17	3	3	GH4_12_W	GH4_12a_3_1.fq.gz	GH4_12a_3_2.fq.gz
17	3	1	GH4_12_D	GH4_12b_1_1.fq.gz	GH4_12b_1_2.fq.gz
17	3	2	GH4_12_D	GH4_12b_2_1.fq.gz	GH4_12b_2_2.fq.gz
17	3	3	GH4_12_D	GH4_12b_3_1.fq.gz	GH4_12b_3_2.fq.gz
10	4	1	GH5_2_W	GH4_2a_1_1.fq.gz	GH4_2a_1_2.fq.gz
10	4	2	GH5_2_W	GH4_2a_2_1.fq.gz	GH4_2a_2_2.fq.gz
10	4	3	GH5_2_W	GH4_2a_3_1.fq.gz	GH4_2a_3_2.fq.gz
10	4	1	GH5_2_D	GH4_2b_1_1.fq.gz	GH4_2b_1_2.fq.gz
10	4	2	GH5_2_D	GH4_2b_2_1.fq.gz	GH4_2b_2_2.fq.gz
10	4	3	GH5_2_D	GH4_2b_3_1.fq.gz	GH4_2b_3_2.fq.gz
13	3	1	GH4_3_W	GH4_3a_1_1.fq.gz	GH4_3a_1_2.fq.gz
13	3	2	GH4_3_W	GH4_3a_2_1.fq.gz	GH4_3a_2_2.fq.gz
13	3	3	GH4_3_W	GH4_3a_3_1.fq.gz	GH4_3a_3_2.fq.gz
13	3	1	GH4_3_D	GH4_3b_1_1.fq.gz	GH4_3b_1_2.fq.gz
13	3	2	GH4_3_D	GH4_3b_2_1.fq.gz	GH4_3b_2_2.fq.gz
13	3	3	GH4_3_D	GH4_3b_3_1.fq.gz	GH4_3b_3_2.fq.gz
14	3	1	GH4_4_W	GH4_4a_1_1.fq.gz	GH4_4a_1_2.fq.gz
14	3	2	GH4_4_W	GH4_4a_2_1.fq.gz	GH4_4a_2_2.fq.gz
14	3	3	GH4_4_W	GH4_4a_3_1.fq.gz	GH4_4a_3_2.fq.gz
14	3	1	GH4_4_D	GH4_4b_1_1.fq.gz	GH4_4b_1_2.fq.gz
14	3	2	GH4_4_D	GH4_4b_2_1.fq.gz	GH4_4b_2_2.fq.gz
14	3	3	GH4_4_D	GH4_4b_3_1.fq.gz	GH4_4b_3_2.fq.gz
15	3	1	GH4_5_W	GH4_5a_1_1.fq.gz	GH4_5a_1_2.fq.gz
15	3	2	GH4_5_W	GH4_5a_2_1.fq.gz	GH4_5a_2_2.fq.gz
15	3	3	GH4_5_W	GH4_5a_3_1.fq.gz	GH4_5a_3_2.fq.gz
15	3	1	GH4_5_D	GH4_5b_1_1.fq.gz	GH4_5b_1_2.fq.gz
15	3	2	GH4_5_D	GH4_5b_2_1.fq.gz	GH4_5b_2_2.fq.gz
15	3	3	GH4_5_D	GH4_5b_3_1.fq.gz	GH4_5b_3_2.fq.gz
16	3	1	GH4_6_W	GH4_6a_1_1.fq.gz	GH4_6a_1_2.fq.gz
16	3	2	GH4_6_W	GH4_6a_2_1.fq.gz	GH4_6a_2_2.fq.gz
16	3	3	GH4_6_W	GH4_6a_3_1.fq.gz	GH4_6a_3_2.fq.gz
16	3	1	GH4_6_D	GH4_6b_1_1.fq.gz	GH4_6b_1_2.fq.gz
16	3	2	GH4_6_D	GH4_6b_2_1.fq.gz	GH4_6b_2_2.fq.gz
16	3	3	GH4_6_D	GH4_6b_3_1.fq.gz	GH4_6b_3_2.fq.gz
17	3	1	GH4_7_W	GH4_7a_1_1.fq.gz	GH4_7a_1_2.fq.gz
17	3	2	GH4_7_W	GH4_7a_2_1.fq.gz	GH4_7a_2_2.fq.gz
17	3	3	GH4_7_W	GH4_7a_3_1.fq.gz	GH4_7a_3_2.fq.gz
17	3	1	GH4_7_D	GH4_7b_1_1.fq.gz	GH4_7b_1_2.fq.gz
17	3	2	GH4_7_D	GH4_7b_2_1.fq.gz	GH4_7b_2_2.fq.gz
17	3	3	GH4_7_D	GH4_7b_3_1.fq.gz	GH4_7b_3_2.fq.gz
17	3	1	GH4_9_W	GH4_9a_1_1.fq.gz	GH4_9a_1_2.fq.gz
17	3	2	GH4_9_W	GH4_9a_2_1.fq.gz	GH4_9a_2_2.fq.gz
17	3	3	GH4_9_W	GH4_9a_3_1.fq.gz	GH4_9a_3_2.fq.gz
17	4	1	GH5_10_W	GH5_10a_1_1.fq.gz	GH5_10a_1_2.fq.gz
17	4	2	GH5_10_W	GH5_10a_2_1.fq.gz	GH5_10a_2_2.fq.gz
17	4	3	GH5_10_W	GH5_10a_3_1.fq.gz	GH5_10a_3_2.fq.gz
17	4	1	GH5_10_D	GH5_10b_1_1.fq.gz	GH5_10b_1_2.fq.gz
17	4	2	GH5_10_D	GH5_10b_2_1.fq.gz	GH5_10b_2_2.fq.gz
17	4	3	GH5_10_D	GH5_10b_3_1.fq.gz	GH5_10b_3_2.fq.gz
10	4	1	GH5_2_W	GH5_2a_1_1.fq.gz	GH5_2a_1_2.fq.gz
10	4	2	GH5_2_W	GH5_2a_2_1.fq.gz	GH5_2a_2_2.fq.gz
10	4	3	GH5_2_W	GH5_2a_3_1.fq.gz	GH5_2a_3_2.fq.gz
10	4	1	GH5_2_D	GH5_2b_1_1.fq.gz	GH5_2b_1_2.fq.gz
10	4	2	GH5_2_D	GH5_2b_2_1.fq.gz	GH5_2b_2_2.fq.gz
10	4	3	GH5_2_D	GH5_2b_3_1.fq.gz	GH5_2b_3_2.fq.gz
12	4	1	GH5_3_W	GH5_3a_1_1.fq.gz	GH5_3a_1_2.fq.gz
12	4	2	GH5_3_W	GH5_3a_2_1.fq.gz	GH5_3a_2_2.fq.gz
12	4	3	GH5_3_W	GH5_3a_3_1.fq.gz	GH5_3a_3_2.fq.gz
12	4	1	GH5_3_D	GH5_3b_1_1.fq.gz	GH5_3b_1_2.fq.gz
12	4	2	GH5_3_D	GH5_3b_2_1.fq.gz	GH5_3b_2_2.fq.gz
12	4	3	GH5_3_D	GH5_3b_3_1.fq.gz	GH5_3b_3_2.fq.gz
13	4	1	GH5_4_W	GH5_4a_1_1.fq.gz	GH5_4a_1_2.fq.gz
13	4	2	GH5_4_W	GH5_4a_2_1.fq.gz	GH5_4a_2_2.fq.gz
13	4	3	GH5_4_W	GH5_4a_3_1.fq.gz	GH5_4a_3_2.fq.gz
13	4	1	GH5_4_D	GH5_4b_1_1.fq.gz	GH5_4b_1_2.fq.gz
13	4	2	GH5_4_D	GH5_4b_2_1.fq.gz	GH5_4b_2_2.fq.gz
13	4	3	GH5_4_D	GH5_4b_3_1.fq.gz	GH5_4b_3_2.fq.gz
14	4	1	GH5_5_W	GH5_5a_1_1.fq.gz	GH5_5a_1_2.fq.gz
14	4	2	GH5_5_W	GH5_5a_2_1.fq.gz	GH5_5a_2_2.fq.gz
14	4	3	GH5_5_W	GH5_5a_3_1.fq.gz	GH5_5a_3_2.fq.gz
14	4	1	GH5_5_D	GH5_5b_1_1.fq.gz	GH5_5b_1_2.fq.gz
14	4	2	GH5_5_D	GH5_5b_2_1.fq.gz	GH5_5b_2_2.fq.gz
14	4	3	GH5_5_D	GH5_5b_3_1.fq.gz	GH5_5b_3_2.fq.gz
14	4	1	GH5_6_W	GH5_6a_1_1.fq.gz	GH5_6a_1_2.fq.gz
14	4	2	GH5_6_W	GH5_6a_2_1.fq.gz	GH5_6a_2_2.fq.gz
14	4	3	GH5_6_W	GH5_6a_3_1.fq.gz	GH5_6a_3_2.fq.gz
14	4	1	GH5_6_D	GH5_6b_1_1.fq.gz	GH5_6b_1_2.fq.gz
14	4	2	GH5_6_D	GH5_6b_2_1.fq.gz	GH5_6b_2_2.fq.gz
14	4	3	GH5_6_D	GH5_6b_3_1.fq.gz	GH5_6b_3_2.fq.gz
15	4	1	GH5_7_W	GH5_7a_1_1.fq.gz	GH5_7a_1_2.fq.gz
15	4	2	GH5_7_W	GH5_7a_2_1.fq.gz	GH5_7a_2_2.fq.gz
15	4	3	GH5_7_W	GH5_7a_3_1.fq.gz	GH5_7a_3_2.fq.gz
15	4	1	GH5_7_D	GH5_7b_1_1.fq.gz	GH5_7b_1_2.fq.gz
15	4	2	GH5_7_D	GH5_7b_2_1.fq.gz	GH5_7b_2_2.fq.gz
15	4	3	GH5_7_D	GH5_7b_3_1.fq.gz	GH5_7b_3_2.fq.gz
21	4	1	VH4_11_W	VH4_11a_1_1.fq.gz	VH4_11a_1_2.fq.gz
21	4	2	VH4_11_W	VH4_11a_2_1.fq.gz	VH4_11a_2_2.fq.gz
21	4	3	VH4_11_W	VH4_11a_3_1.fq.gz	VH4_11a_3_2.fq.gz
21	4	1	VH4_11_D	VH4_11b_1_1.fq.gz	VH4_11b_1_2.fq.gz
21	4	2	VH4_11_D	VH4_11b_2_1.fq.gz	VH4_11b_2_2.fq.gz
21	4	3	VH4_11_D	VH4_11b_3_1.fq.gz	VH4_11b_3_2.fq.gz
21	4	1	VH4_12_W	VH4_12a_1_1.fq.gz	VH4_12a_1_2.fq.gz
21	4	2	VH4_12_W	VH4_12a_2_1.fq.gz	VH4_12a_2_2.fq.gz
21	4	3	VH4_12_W	VH4_12a_3_1.fq.gz	VH4_12a_3_2.fq.gz
21	4	1	VH4_12_D	VH4_12b_1_1.fq.gz	VH4_12b_1_2.fq.gz
21	4	2	VH4_12_D	VH4_12b_2_1.fq.gz	VH4_12b_2_2.fq.gz
21	4	3	VH4_12_D	VH4_12b_3_1.fq.gz	VH4_12b_3_2.fq.gz
20	4	1	VH4_4_W	VH4_4a_1_1.fq.gz	VH4_4a_1_2.fq.gz
20	4	2	VH4_4_W	VH4_4a_2_1.fq.gz	VH4_4a_2_2.fq.gz
20	4	3	VH4_4_W	VH4_4a_3_1.fq.gz	VH4_4a_3_2.fq.gz
20	4	1	VH4_4_D	VH4_4b_1_1.fq.gz	VH4_4b_1_2.fq.gz
20	4	2	VH4_4_D	VH4_4b_2_1.fq.gz	VH4_4b_2_2.fq.gz
20	4	3	VH4_4_D	VH4_4b_3_1.fq.gz	VH4_4b_3_2.fq.gz
20	4	1	VH4_6_W	VH4_6a_1_1.fq.gz	VH4_6a_1_2.fq.gz
20	4	2	VH4_6_W	VH4_6a_2_1.fq.gz	VH4_6a_2_2.fq.gz
20	4	3	VH4_6_W	VH4_6a_3_1.fq.gz	VH4_6a_3_2.fq.gz
20	4	1	VH4_6_D	VH4_6b_1_1.fq.gz	VH4_6b_1_2.fq.gz
20	4	2	VH4_6_D	VH4_6b_2_1.fq.gz	VH4_6b_2_2.fq.gz
20	4	3	VH4_6_D	VH4_6b_3_1.fq.gz	VH4_6b_3_2.fq.gz
20	4	1	VH4_7_W	VH4_7a_1_1.fq.gz	VH4_7a_1_2.fq.gz
20	4	2	VH4_7_W	VH4_7a_2_1.fq.gz	VH4_7a_2_2.fq.gz
20	4	3	VH4_7_W	VH4_7a_3_1.fq.gz	VH4_7a_3_2.fq.gz
20	4	1	VH4_7_D	VH4_7b_1_1.fq.gz	VH4_7b_1_2.fq.gz
20	4	2	VH4_7_D	VH4_7b_2_1.fq.gz	VH4_7b_2_2.fq.gz
20	4	3	VH4_7_D	VH4_7b_3_1.fq.gz	VH4_7b_3_2.fq.gz
21	4	1	VH4_8_W	VH4_8a_1_1.fq.gz	VH4_8a_1_2.fq.gz
21	4	2	VH4_8_W	VH4_8a_2_1.fq.gz	VH4_8a_2_2.fq.gz
21	4	3	VH4_8_W	VH4_8a_3_1.fq.gz	VH4_8a_3_2.fq.gz
21	4	1	VH4_8_D	VH4_8b_1_1.fq.gz	VH4_8b_1_2.fq.gz
21	4	2	VH4_8_D	VH4_8b_2_1.fq.gz	VH4_8b_2_2.fq.gz
21	4	3	VH4_8_D	VH4_8b_3_1.fq.gz	VH4_8b_3_2.fq.gz
21	4	1	VH5_11_W	VH5_11a_1_1.fq.gz	VH5_11a_1_2.fq.gz
21	4	2	VH5_11_W	VH5_11a_2_1.fq.gz	VH5_11a_2_2.fq.gz
21	4	3	VH5_11_W	VH5_11a_3_1.fq.gz	VH5_11a_3_2.fq.gz
21	4	1	VH5_11_D	VH5_11b_1_1.fq.gz	VH5_11b_1_2.fq.gz
21	4	2	VH5_11_D	VH5_11b_2_1.fq.gz	VH5_11b_2_2.fq.gz
21	4	3	VH5_11_D	VH5_11b_3_1.fq.gz	VH5_11b_3_2.fq.gz
20	4	1	VH5_2_W	VH5_2a_1_1.fq.gz	VH5_2a_1_2.fq.gz
20	4	2	VH5_2_W	VH5_2a_2_1.fq.gz	VH5_2a_2_2.fq.gz
20	4	3	VH5_2_W	VH5_2a_3_1.fq.gz	VH5_2a_3_2.fq.gz
20	4	1	VH5_2_D	VH5_2b_1_1.fq.gz	VH5_2b_1_2.fq.gz
20	4	2	VH5_2_D	VH5_2b_2_1.fq.gz	VH5_2b_2_2.fq.gz
20	4	3	VH5_2_D	VH5_2b_3_1.fq.gz	VH5_2b_3_2.fq.gz
20	4	1	VH5_5_W	VH5_5a_1_1.fq.gz	VH5_5a_1_2.fq.gz
20	4	2	VH5_5_W	VH5_5a_2_1.fq.gz	VH5_5a_2_2.fq.gz
20	4	3	VH5_5_W	VH5_5a_3_1.fq.gz	VH5_5a_3_2.fq.gz
20	4	1	VH5_5_D	VH5_5b_1_1.fq.gz	VH5_5b_1_2.fq.gz
20	4	2	VH5_5_D	VH5_5b_2_1.fq.gz	VH5_5b_2_2.fq.gz
20	4	3	VH5_5_D	VH5_5b_3_1.fq.gz	VH5_5b_3_2.fq.gz
20	4	1	VH5_6_W	VH5_6a_1_1.fq.gz	VH5_6a_1_2.fq.gz
20	4	2	VH5_6_W	VH5_6a_2_1.fq.gz	VH5_6a_2_2.fq.gz
20	4	3	VH5_6_W	VH5_6a_3_1.fq.gz	VH5_6a_3_2.fq.gz
20	4	1	VH5_6_D	VH5_6b_1_1.fq.gz	VH5_6b_1_2.fq.gz
20	4	2	VH5_6_D	VH5_6b_2_1.fq.gz	VH5_6b_2_2.fq.gz
20	4	3	VH5_6_D	VH5_6b_3_1.fq.gz	VH5_6b_3_2.fq.gz
21	4	1	VH5_8_W	VH5_8a_1_1.fq.gz	VH5_8a_1_2.fq.gz
21	4	2	VH5_8_W	VH5_8a_2_1.fq.gz	VH5_8a_2_2.fq.gz
21	4	3	VH5_8_W	VH5_8a_3_1.fq.gz	VH5_8a_3_2.fq.gz
21	4	1	VH5_8_D	VH5_8b_1_1.fq.gz	VH5_8b_1_2.fq.gz
21	4	2	VH5_8_D	VH5_8b_2_1.fq.gz	VH5_8b_2_2.fq.gz
21	4	3	VH5_8_D	VH5_8b_3_1.fq.gz	VH5_8b_3_2.fq.gz
21	4	1	VH5_9_W	VH5_9a_1_1.fq.gz	VH5_9a_1_2.fq.gz
21	4	2	VH5_9_W	VH5_9a_2_1.fq.gz	VH5_9a_2_2.fq.gz
21	4	3	VH5_9_W	VH5_9a_3_1.fq.gz	VH5_9a_3_2.fq.gz
21	4	1	VH5_9_D	VH5_9b_1_1.fq.gz	VH5_9b_1_2.fq.gz
21	4	2	VH5_9_D	VH5_9b_2_1.fq.gz	VH5_9b_2_2.fq.gz
21	4	3	VH5_9_D	VH5_9b_3_1.fq.gz	VH5_9b_3_2.fq.gz
21	5	1	VH6_10_W	VH6_10a_1_1.fq.gz	VH6_10a_1_2.fq.gz
21	5	2	VH6_10_W	VH6_10a_2_1.fq.gz	VH6_10a_2_2.fq.gz
21	5	3	VH6_10_W	VH6_10a_3_1.fq.gz	VH6_10a_3_2.fq.gz
21	5	1	VH6_10_D	VH6_10b_1_1.fq.gz	VH6_10b_1_2.fq.gz
21	5	2	VH6_10_D	VH6_10b_2_1.fq.gz	VH6_10b_2_2.fq.gz
21	5	3	VH6_10_D	VH6_10b_3_1.fq.gz	VH6_10b_3_2.fq.gz
22	5	1	VH6_11_W	VH6_11a_1_1.fq.gz	VH6_11a_1_2.fq.gz
22	5	2	VH6_11_W	VH6_11a_2_1.fq.gz	VH6_11a_2_2.fq.gz
22	5	3	VH6_11_W	VH6_11a_3_1.fq.gz	VH6_11a_3_2.fq.gz
22	5	1	VH6_11_D	VH6_11b_1_1.fq.gz	VH6_11b_1_2.fq.gz
22	5	2	VH6_11_D	VH6_11b_2_1.fq.gz	VH6_11b_2_2.fq.gz
22	5	3	VH6_11_D	VH6_11b_3_1.fq.gz	VH6_11b_3_2.fq.gz
22	5	1	VH6_12_W	VH6_12a_1_1.fq.gz	VH6_12a_1_2.fq.gz
22	5	2	VH6_12_W	VH6_12a_2_1.fq.gz	VH6_12a_2_2.fq.gz
22	5	3	VH6_12_W	VH6_12a_3_1.fq.gz	VH6_12a_3_2.fq.gz
22	5	1	VH6_12_D	VH6_12b_1_1.fq.gz	VH6_12b_1_2.fq.gz
22	5	2	VH6_12_D	VH6_12b_2_1.fq.gz	VH6_12b_2_2.fq.gz
22	5	3	VH6_12_D	VH6_12b_3_1.fq.gz	VH6_12b_3_2.fq.gz
20	4	1	VH6_1_W	VH6_1a_1_1.fq.gz	VH6_1a_1_2.fq.gz
20	4	2	VH6_1_W	VH6_1a_2_1.fq.gz	VH6_1a_2_2.fq.gz
20	4	3	VH6_1_W	VH6_1a_3_1.fq.gz	VH6_1a_3_2.fq.gz
20	4	1	VH6_1_D	VH6_1b_1_1.fq.gz	VH6_1b_1_2.fq.gz
20	4	2	VH6_1_D	VH6_1b_2_1.fq.gz	VH6_1b_2_2.fq.gz
20	4	3	VH6_1_D	VH6_1b_3_1.fq.gz	VH6_1b_3_2.fq.gz
20	4	1	VH6_2_W	VH6_2a_1_1.fq.gz	VH6_2a_1_2.fq.gz
20	4	2	VH6_2_W	VH6_2a_2_1.fq.gz	VH6_2a_2_2.fq.gz
20	4	3	VH6_2_W	VH6_2a_3_1.fq.gz	VH6_2a_3_2.fq.gz
20	4	1	VH6_2_D	VH6_2b_1_1.fq.gz	VH6_2b_1_2.fq.gz
20	4	2	VH6_2_D	VH6_2b_2_1.fq.gz	VH6_2b_2_2.fq.gz
20	4	3	VH6_2_D	VH6_2b_3_1.fq.gz	VH6_2b_3_2.fq.gz
20	4	1	VH6_3_W	VH6_3a_1_1.fq.gz	VH6_3a_1_2.fq.gz
20	4	2	VH6_3_W	VH6_3a_2_1.fq.gz	VH6_3a_2_2.fq.gz
20	4	3	VH6_3_W	VH6_3a_3_1.fq.gz	VH6_3a_3_2.fq.gz
20	4	1	VH6_3_D	VH6_3b_1_1.fq.gz	VH6_3b_1_2.fq.gz
20	4	2	VH6_3_D	VH6_3b_2_1.fq.gz	VH6_3b_2_2.fq.gz
20	4	3	VH6_3_D	VH6_3b_3_1.fq.gz	VH6_3b_3_2.fq.gz
20	4	1	VH6_4_W	VH6_4a_1_1.fq.gz	VH6_4a_1_2.fq.gz
20	4	2	VH6_4_W	VH6_4a_2_1.fq.gz	VH6_4a_2_2.fq.gz
20	4	3	VH6_4_W	VH6_4a_3_1.fq.gz	VH6_4a_3_2.fq.gz
21	4	1	VH6_4_D	VH6_4b_1_1.fq.gz	VH6_4b_1_2.fq.gz
21	4	2	VH6_4_D	VH6_4b_2_1.fq.gz	VH6_4b_2_2.fq.gz
21	4	3	VH6_4_D	VH6_4b_3_1.fq.gz	VH6_4b_3_2.fq.gz
21	4	1	VH6_5_W	VH6_5a_1_1.fq.gz	VH6_5a_1_2.fq.gz
21	4	2	VH6_5_W	VH6_5a_2_1.fq.gz	VH6_5a_2_2.fq.gz
21	4	3	VH6_5_W	VH6_5a_3_1.fq.gz	VH6_5a_3_2.fq.gz
21	4	1	VH6_5_D	VH6_5b_1_1.fq.gz	VH6_5b_1_2.fq.gz
21	4	2	VH6_5_D	VH6_5b_2_1.fq.gz	VH6_5b_2_2.fq.gz
21	4	3	VH6_5_D	VH6_5b_3_1.fq.gz	VH6_5b_3_2.fq.gz
21	4	1	VH6_7_W	VH6_7a_1_1.fq.gz	VH6_7a_1_2.fq.gz
21	4	2	VH6_7_W	VH6_7a_2_1.fq.gz	VH6_7a_2_2.fq.gz
21	4	3	VH6_7_W	VH6_7a_3_1.fq.gz	VH6_7a_3_2.fq.gz
21	4	1	VH6_7_D	VH6_7b_1_1.fq.gz	VH6_7b_1_2.fq.gz
21	4	2	VH6_7_D	VH6_7b_2_1.fq.gz	VH6_7b_2_2.fq.gz
21	4	3	VH6_7_D	VH6_7b_3_1.fq.gz	VH6_7b_3_2.fq.gz
21	4	1	VH6_8_W	VH6_8a_1_1.fq.gz	VH6_8a_1_2.fq.gz
21	4	2	VH6_8_W	VH6_8a_2_1.fq.gz	VH6_8a_2_2.fq.gz
21	4	3	VH6_8_W	VH6_8a_3_1.fq.gz	VH6_8a_3_2.fq.gz
21	4	1	VH6_8_D	VH6_8b_1_1.fq.gz	VH6_8b_1_2.fq.gz
21	4	2	VH6_8_D	VH6_8b_2_1.fq.gz	VH6_8b_2_2.fq.gz
21	4	3	VH6_8_D	VH6_8b_3_1.fq.gz	VH6_8b_3_2.fq.gz
21	4	1	VH6_9_W	VH6_9a_1_1.fq.gz	VH6_9a_1_2.fq.gz
21	4	2	VH6_9_W	VH6_9a_2_1.fq.gz	VH6_9a_2_2.fq.gz
21	4	3	VH6_9_W	VH6_9a_3_1.fq.gz	VH6_9a_3_2.fq.gz
21	4	1	VH6_9_D	VH6_9b_1_1.fq.gz	VH6_9b_1_2.fq.gz
21	4	2	VH6_9_D	VH6_9b_2_1.fq.gz	VH6_9b_2_2.fq.gz
21	4	3	VH6_9_D	VH6_9b_3_1.fq.gz	VH6_9b_3_2.fq.gz
